# Supplementary material for: Mechanistic routes toward C3 products in copper-catalysed CO2 electroreduction
Source: Royal Society of Chemistry journal article supplement (doi:10.1039/d1cy01423d), 2022-01-01
Supplement: d1cy01423d1.pdf [file d1cy01423d1.pdf]

## Supplementary Information

### Mechanistic Routes Toward C<sub>3</sub> Products in Copper-Catalysed CO<sub>2</sub> Electroreduction

Sergio Pablo-García<sup>a†</sup>, Florentine L. P. Veenstra<sup>b†</sup>, Louisa Rui Lin Ting<sup>c,d,†</sup>, Rodrigo García-Muelas<sup>a</sup>, Antonio J. Martín<sup>b</sup>, Federico Dattila<sup>a</sup>, Boon Siang Yeo<sup>c,d,\*</sup>, Javier Pérez-Ramírez<sup>b,\*</sup>, Núria López<sup>a,\*</sup>

*a. Institute of Chemical Research of Catalonia, ICIQ, The Barcelona Institute of Science and Technology. Av. Països Catalans 16, 43007 Tarragona. Spain.*

*b. Institute for Chemical and Bioengineering, Department of Chemistry and Applied Biosciences, ETH Zürich, Vladimir-Prelog-Weg 1, 8093 Zürich, Switzerland.*

*c. Department of Chemistry, National University of Singapore, 3 Science Drive 3, Singapore 117543.*

*d. Solar Energy Research Institute of Singapore, National University of Singapore, 7 Engineering Drive 1, Singapore 117574.*

<sup>†</sup> These authors contributed equally to this work.

\*Corresponding author: [chmyeos@nus.edu.sg](mailto:chmyeos@nus.edu.sg); [jpr@chem.ethz.ch](mailto:jpr@chem.ethz.ch); [nlopez@iciq.es](mailto:nlopez@iciq.es)

|                                                                                                      |           |
|------------------------------------------------------------------------------------------------------|-----------|
| <b>EXPERIMENTAL AND COMPUTATIONAL DETAILS .....</b>                                                  | <b>2</b>  |
| REAGENTS .....                                                                                       | 2         |
| PREPARATION OF CuO-MODIFIED Cu FOILS .....                                                           | 2         |
| ELECTROCHEMICAL MEASUREMENTS IN 0.1 M POTASSIUM HYDROXIDE .....                                      | 2         |
| ELECTROCHEMICAL MEASUREMENTS IN 0.1 M POTASSIUM PHOSPHATE BUFFER .....                               | 3         |
| ELECTROCHEMICAL MEASUREMENTS IN 0.1 M POTASSIUM BICARBONATE .....                                    | 3         |
| CATALYST CHARACTERISATION .....                                                                      | 3         |
| PRODUCT ANALYSIS .....                                                                               | 4         |
| DENSITY FUNCTIONAL THEORY .....                                                                      | 4         |
| AUTOMATIC GENERATION OF INTERMEDIATES .....                                                          | 5         |
| FORMATION ENERGIES OF INTERMEDIATES AND TRANSITION STATES .....                                      | 5         |
| GRAPH REPRESENTATION OF THE REACTION NETWORK .....                                                   | 6         |
| <b>SUPPLEMENTARY NOTES .....</b>                                                                     | <b>7</b>  |
| NOTE S1: ON THE ANALYSIS OF THE REACTION NETWORK .....                                               | 7         |
| NOTE S2: COMPUTING THE TRANSITION STATES FOR THE C <sub>1</sub> –C <sub>2</sub> BOND FORMATION ..... | 7         |
| NOTE S3: EFFICIENCY OF AUTOMATION IN DFT .....                                                       | 8         |
| NOTE S4: EXTENSION OF THE GRAPH NETWORK FOR C <sub>3</sub> .....                                     | 8         |
| NOTE S5: HEYROVSKY AND TAFEL-LIKE STEPS IN ENERGY PROFILES .....                                     | 8         |
| NOTE S6: CHARGE BENCHMARKING .....                                                                   | 9         |
| NOTE S7: REACTION CONDITIONS .....                                                                   | 9         |
| NOTE S8: CONFORMATIONAL SEARCH .....                                                                 | 10        |
| NOTE S9: LINEAR SCALING RELATIONSHIPS FOR C <sub>1</sub> –C <sub>2</sub> COUPLINGS .....             | 10        |
| <b>SUPPLEMENTARY FIGURES .....</b>                                                                   | <b>11</b> |
| <b>SUPPLEMENTARY TABLES .....</b>                                                                    | <b>24</b> |
| <b>REFERENCES .....</b>                                                                              | <b>43</b> |

## Experimental and Computational Details

### Reagents

All reagents used are commercially available: acetaldehyde (33.7  $\mu\text{L}$ , 50 mM,  $\geq 99.5\%$ , Sigma-Aldrich), formaldehyde (113  $\mu\text{L}$ , 50 mM, 16% w/v in ultrapure water, methanol-free, Thermo Scientific Pierce), glyoxal (60.8  $\mu\text{L}$ , 50 mM, 40 wt% in  $\text{H}_2\text{O}$ , Alfa Aesar), sodium oxalate (54 mg, 50 mM, 99.5%, Fluka BioChemika), ethanol (23.4  $\mu\text{L}$ , 50 mM, 99.8%, Fischer Chemicals), ethylene glycol (22.4  $\mu\text{L}$ , 50 mM, 98+%, Merck), sodium acetate (32.8 mg, 50 mM, 99+%, VWR Chemicals), methanol (16.2  $\mu\text{L}$ , 50 mM, Fluka Analytical), carbon monoxide (99.997%, Air Liquide), propionaldehyde (44.6  $\mu\text{L}$ , 50 mM, 97 %, Sigma-Aldrich) and allyl alcohol (41.2  $\mu\text{L}$ , 50 mM,  $\geq 99\%$ , Sigma-Aldrich).

### Preparation of CuO-modified Cu foils

Cu foils (99.9%, 15×22×0.3 mm) were individually polished using a sequence of SiC paper (1200  $\mu\text{m}$  grit) and alumina suspensions (0.3  $\mu\text{m}$  and 0.05  $\mu\text{m}$ ), after which they were sonicated in water and then in ethanol and finally dried. The foils were then submerged in a one-compartment cell containing a freshly prepared electrodeposition bath under a two-electrode configuration. A constant current of 8  $\text{mA cm}^{-2}$  was applied for 10 minutes to electrodeposit CuO. A Pt wire was used as the counter electrode. The electrodeposition bath was prepared by mixing L-tartaric acid (1.5 g, 99%, Sigma-Aldrich) and copper sulfate pentahydrate (2.5 g,  $\geq 99\%$ , Sigma-Aldrich) in 50 mL deionised water for 10 min, then adding sodium hydroxide (4.0 g, 99.99%, Sigma-Aldrich) to adjust the pH from 1.0 to 13.4.

### Electrochemical measurements in 0.1 M potassium hydroxide

The electrocatalytic tests using various reagents were conducted using a three-electrode configuration in a custom-made gas-tight cell consisting of two compartments separated by a Nafion 211 membrane with gas-flow inlet and outlet ports. The cell was mounted with a gas diffusion layer (GDL) carbon paper acting as the counter electrode (Sigracet 39BC, SGL Carbon) and a CuO-modified Cu foil electrode (0.49  $\text{cm}^2$ ) as the working electrode. Before electrolysis, the working electrode was pre-reduced to OD-Cu for 5 min in pure  $\text{N}_2$ -purged electrolyte at  $-0.6\text{ V vs. RHE}$ . A leak-free Ag/AgCl electrode (3 M KCl, model LF-1, Innovative Instruments) served as the reference. The cathodic and anodic compartments contained 8 and 7.8  $\text{cm}^3$  of 0.1 M potassium hydroxide (pH 13), respectively. The catholyte was stirred at 400 rpm. A  $\text{N}_2$  flow at a low rate of 2  $\text{cm}^3\text{ min}^{-1}$  was bubbled separately into each compartment to maximize the concentration of the gaseous products, which resulted in a quasi-batch configuration during electrolysis. Both chambers were connected to syringes allowing for a slight expansion of the headspace to minimize pressure variations. The electrochemical measurements were conducted by an Autolab PGSTAT302N potentiostat at room temperature, with all potential values reported versus the RHE scale. The experiments were carried out with the R compensation function set at 85% of the uncompensated resistance  $R_u$ , determined by electrochemical impedance spectroscopy (EIS) measurements at high frequency (10 000 Hz).  $R_u$  was calculated every 10 min and used to continuously correct the applied overpotential during the entire 90 min electrolysis. Following this procedure, the applied potentials were within 10 mV of the target potential.

### Electrochemical measurements in 0.1 M potassium phosphate buffer

The electrolysis experiments were performed in an H-type cell separated by an anion-exchange membrane (Selemion AMVN, AGC Asahi Glass). The cell was mounted with the CuO-modified Cu foil electrode (exposed geometric area of 0.785 cm<sup>2</sup>) as the working electrode, Ag/AgCl reference electrode (saturated KCl, Pine), and graphite rod as the counter electrode. Before electrolysis, the working electrode was pre-reduced to OD-Cu for 5 min in pure N<sub>2</sub>-purged electrolyte at -0.6 V vs. RHE. The cathodic and anodic compartments contained 12 and 8 cm<sup>3</sup> of 0.1 M potassium phosphate buffer (pH 7; 0.062 M K<sub>2</sub>HPO<sub>4</sub> + 0.038 M KH<sub>2</sub>PO<sub>4</sub>), respectively. A N<sub>2</sub> flow of 5 cm<sup>3</sup> min<sup>-1</sup> was separately bubbled into each compartment, with a continuous flow from the cathode chamber into an online GC (Agilent 7890A) for detection of gaseous products. The electrochemical measurement was performed using a Gamry Reference 600 potentiostat/galvanostat at room temperature and the current interrupt method was used to compensate for the *iR* drop throughout the 60 min electrolysis.

### Electrochemical measurements in 0.1 M potassium bicarbonate

Electrolysis of CO<sub>2</sub> was performed in an H-type cell separated by an anion-exchange membrane (Selemion AMVN, AGC Asahi Glass). The cell was mounted with the CuO-modified Cu foil electrode (exposed geometric area of 0.785 cm<sup>2</sup>) as the working electrode, Ag/AgCl as the reference electrode (saturated KCl, Pine) and graphite rod as the counter electrode. Before electrolysis, the working electrode was pre-reduced to OD-Cu for 5 min in N<sub>2</sub>-purged electrolyte at -0.6 V vs. RHE. The cathodic and anodic compartments contained 12 and 8 cm<sup>3</sup> of 0.1 M KHCO<sub>3</sub> (99.99 %, Meryer), respectively. CO<sub>2</sub> was bubbled into each compartment at 20 cm<sup>3</sup> min<sup>-1</sup>. The gases in the headspace of the cathode chamber were continuously flowed into an online GC (Agilent 7890A) for the detection of gaseous products. The electrochemical measurement was performed using a Gamry Reference 600 potentiostat/galvanostat at room temperature and the current interrupt method was used to compensate for the *iR* drop throughout the 60 min electrolysis.

Linear sweep voltammetry (LSV) was performed in N<sub>2</sub>- and CO<sub>2</sub>- purged 0.1 M KHCO<sub>3</sub> using the same cell setup as CO<sub>2</sub> electrolysis. Before the measurement, the CuO-modified Cu foil was pre-reduced to OD-Cu for 5 min in N<sub>2</sub>-purged electrolyte at -0.6 V vs. RHE. The OD-Cu was then used as the working electrode for the LSV measurement. Ag/AgCl (saturated KCl, Pine) was used as the reference electrode and a graphite rod was used as the counter electrode. The electrolyte was purged with N<sub>2</sub> or CO<sub>2</sub> for at least 30 min before being used for experiments. During the measurement, the cell was continuously purged with N<sub>2</sub> or CO<sub>2</sub> at a rate of 20 cm<sup>3</sup> min<sup>-1</sup>. The scan rate used was 5 mV s<sup>-1</sup>. The electrochemical measurement was performed using a Gamry Reference 600 potentiostat/galvanostat at room temperature, with the current interrupt method used to compensate for the *iR* drop.

### Catalyst characterisation

X-ray diffraction (XRD) was performed with a Siemens 5005 (CuK $\alpha$  radiation with graphite monochromator), in locked  $\theta$ -2 $\theta$  scan mode from 20 to 100° 2 $\theta$  with 0.1° resolution step and 1 second acquisition time per step.

## Product analysis

Liquid products formed during electrolysis in 0.1 M KOH were quantified by  $^1\text{H}$ -NMR. Following the reaction, catholyte and anolyte samples ( $0.7\text{ cm}^3$ ) were each mixed with  $\text{D}_2\text{O}$  ( $0.05\text{ cm}^3$ ) containing phenol (50 mM) and dimethyl sulfoxide (50 mM) as internal standards. 1D  $^1\text{H}$ -NMR spectra of the sample with water suppression were recorded on a Bruker Avance III HD 500 MHz mounted with a 5 mm BBO Prodigy (at room temperature). Pulse experiments were pre-saturated on the water resonance with a  $\pi/2$  pulse of  $12\text{ }\mu\text{s}$  (at a power of 15.9 W, accounting for -12.1 dB) and a recycle delay of 5 s (with pre-set power of  $9.2\times 10^{-5}\text{ W}$  accounting for 40.38 dB) was implemented while co-adding 256 scans per experiment. These settings resulted in a high signal-to-noise ratio and an analysis time of *ca.* 35 minutes per sample. The detection limit is  $0.5\text{ }\mu\text{M}$ .

Propylene production during electrolysis in 0.1 M KOH was quantified by headspace gas chromatography-mass spectrometry (GC-MS). All GC-MS measurements were conducted using Agilent 7890B (G3440B) GC connected to Agilent 5977A (G7039A) MS. The 20 mL headspace vials (Agilent 5188-2753 Hdsp cap 18 mm magnetic PTFE/Sil Agilent 5188-2759) were placed in an autosampler (PAL RSI 120 G7368-64100). All separations were carried out using helium carrier gas over an Agilent 121-5522LTM DB column. The detection limit is around 0.1 ppm.

Gaseous products formed during electrolysis in 0.1 M potassium phosphate buffer (pH 7;  $0.062\text{ M K}_2\text{HPO}_4 + 0.038\text{ M KH}_2\text{PO}_4$ ) and  $0.1\text{ M KHCO}_3$ , were quantified using on-line GC with flame ionisation detector (FID) and thermal conductivity detector (TCD) sampling every 19.6 min. The detection limit is 0.5 ppm, which is equivalent to a production rate of  $0.5\text{ }\mu\text{mol cm}^{-2}\text{ h}^{-1}$ . Liquid products were quantified using headspace gas chromatography (HSGC) and high-performance liquid chromatography (HPLC). Alcohols and carbonyl compounds were analysed by HSGC (Agilent, 7890B and 7697A). The detection was performed by FID, with a detection limit of  $0.2\text{ }\mu\text{M}$ , equivalent to a production rate of  $0.3\text{ mol cm}^{-2}\text{ h}^{-1}$ . HPLC analysis of formate and acetate was conducted using Agilent 1260 Infinity with a variable wavelength detector (VWD), using 0.5 mM sulfuric acid (96% Suprapur, Merck) as the mobile phase. The resulting detection limit is  $2\text{ }\mu\text{M}$ , corresponding to a production rate of  $3\text{ mol cm}^{-2}\text{ h}^{-1}$ .

## Density Functional Theory

Periodic DFT calculations were performed with the Vienna Ab-initio Simulation Package (VASP)<sup>1</sup> and Perdew–Burke–Ernzerhof (PBE)<sup>2</sup> density functional including van der Waals D2 corrections<sup>3</sup>. To avoid the over-binding tendency of the D2 method, we employed our reparametrised  $C_6$  coefficients for the metals<sup>4</sup>. Core electrons were represented by PAW<sup>5</sup> while valence electrons were expanded in plane waves with a kinetic cut-off energy of 450 eV. The Cu surface was modelled as a four-layer Cu(100) slab, the most stable surface at working potentials<sup>6,7</sup>. The Brillouin zone was sampled by a  $\Gamma$ -centered k-points mesh from the Monkhorst-Pack method with a reciprocal grid size smaller than  $0.03\text{ }\text{\AA}^{-1}$ . Transition states were identified from the climbing image version of the Nudged Elastic Band (CI-NEB) method<sup>8</sup>. All structures were converged by forces, using as thresholds 0.02 and  $0.05\text{ eV }\text{\AA}^{-1}$  for adsorbates and transition states, respectively. Computed structures are available through the

ioChem-BD database<sup>9,10</sup>. The solvent was introduced through our in-house developed implicit model, VASP-MGCM<sup>11,12</sup>. The Computational Hydrogen Electrode (CHE)<sup>13,14</sup> was used as the electrochemical model. Accuracy tests on density functionals (comparing PBE-D2 barriers with BEEF-vdW), LSR, and charge analysis are described in **Note S6** and **Figures S6-S9**.

### Automatic generation of intermediates

Due to the high number of species involved, around 500, the intermediates of the reaction network were automatically generated. First, we started with fully hydrogenated C<sub>1</sub>–C<sub>4</sub> molecules: methane, methanol, formic acid, acetic acid, ethane, ethanol, ethylene glycol, 1-propanol, 2-propanol, 1,2-propanediol, and 1,3-propanediol. To generate the different intermediates throughout the network, we took the molecules in the previous list as energy references and converted them to graphs<sup>15</sup> where each node represents an atom, labelled with its element, and the edges represent the bonds between atoms, each for one structure (s-graph). Then, the following steps are performed recursively:

- 1) a hydrogen node from the graph is selected;
- 2) the hydrogen atom is removed by generating a subgraph without the selected node;
- 3) an isomorphism test is performed to compare the subgraph with the rest of the generated subgraphs thus avoiding chemically equivalent geometries;
- 4) if no equivalent subgraphs are found, the subgraph is stored along with its connection to its mother graph;
- 5) repeat the process on the newly generated subgraphs until no hydrogen nodes are found in the subgraph.

With the connectivity information, all structures are then adjusted to their most likely adsorption conformations, **Note S8**, and their energies are explicitly evaluated with DFT. Related methodologies to explore complex routes have been put forward for the CO<sub>2</sub> hydrogenation to starches<sup>16</sup> in thermo- and biocatalysis.

### Formation energies of intermediates and transition states

The energies as obtained by VASP ( $E_{C_xH_yO_z^*,VASP}$ ) were initially written as a function of the clean surface, CO<sub>2</sub>, water, and hydrogen as energy references, **Eq. S1-S2**. Following the CHE formalism, the DFT energy of H<sup>+</sup> ( $E_{H^+}$ ) at the RHE scale is approximated as ½H<sub>2</sub> (as obtained from VASP,  $E_{H_2,VASP}$ ). The result inside the curly brackets of **Eq. S2** is herein called DFT energy ( $E_{C_xH_yO_z^*,DFT}$ ). Implicit solvation<sup>11,12</sup> ( $E_{solv}$ ) and polarisation<sup>17</sup> corrections ( $\Delta Q_B \cdot U$ ) were then applied to get the potential energies used throughout the Manuscript ( $E_{C_xH_yO_z^*}$ , or  $E$  in shorthand notation, **Eq. S2**). The energy related to electron transfers equals the number of electrons transferred times the electric potential  $U$ . Some molecules drag electronic density from the surface; for instance, adsorbed OH has around 8 electrons, obtained from their Bader charges (benchmarked against Mulliken or dipole derived provide similar estimates), instead of the nominal charge of the neutral fragment 7 than would be employed in the standard CHE approach<sup>18,19</sup>. Thus, the external potential contribution, written as  $-(2x+y-z)e^-U$ , requires an additional polarisation term  $\Delta Q_B \cdot U$  that has been then added as a correction to the DFT energy,

**Eq. S2.** To assess the validity of the Bader polarisation term, charge estimates were performed with two alternative methodologies, taking derived from the dipole correction and Mulliken population analyses respectively, **Note S6** and **Figures S8-S9**. The tests demonstrate that the choice of Bader charges is reasonable besides easier to implement.

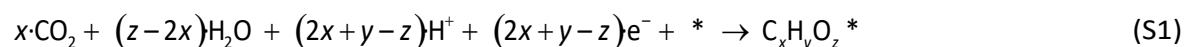

$$E_{\text{C}_x\text{H}_y\text{O}_z^*, \text{DFT}} = E_{\text{C}_x\text{H}_y\text{O}_z^*, \text{VASP}} - E_{*, \text{VASP}} - xE_{\text{CO}_2, \text{VASP}} + (2x - z)E_{\text{H}_2\text{O}, \text{VASP}} + (-2x - y + z)E_{\text{H}^+} + (-2x - y + z)e^-U \quad (\text{S2})$$

$$E_{\text{H}^+} = \frac{1}{2} E_{\text{H}_2, \text{VASP}} \quad (\text{S3})$$

$$E \equiv E_{\text{C}_x\text{H}_y\text{O}_z^*} = E_{\text{C}_x\text{H}_y\text{O}_z^*, \text{DFT}} + \Delta Q_{\text{B}} \cdot U + E_{\text{solv}} \quad (\text{S4})$$

Reaction energies and barriers were then obtained from **Eq. 3-4**, where  $E_{\text{IS}}$ ,  $E_{\text{FS}}$ , and  $E_{\text{TS}}$  represent the energies of initial, final, and transition states respectively. As uncertainty in such quantities may affect selectivity trends<sup>20-23</sup>, all relevant transition states were explicitly calculated *via* DFT. These include all 586 C<sub>1</sub>-C<sub>2</sub> couplings and 8 C-H/O-H hydrogenations and 10 C-O(H) bond breakings from CH<sub>2</sub>CHCHO to propanol and propylene. The remaining energies for C-H and O-H hydrogenations were approximated from LSR available for Cu<sup>15</sup>, **Eq. 5** and **Table S15**. These equations also hold in solvated environments<sup>12</sup>. We found that, for C-H and O-H hydrogenation reactions, LSR describe with sufficient accuracy our DFT results, **Figure S7**. Differences in Bader charges upon reaction, shown in **Table S18**, were calculated from **Eq. 6**, and typically ranges between -0.3 to +0.7 e<sup>-</sup> (**Table S18**). When constructing the energy profiles (**Figure 4-5, S4-S5, S10-S15**), we considered that all hydrogenations as Tafel-like elementary steps, except from O or OH stripping, which involves a Heyrovsky-like step, **Note S5**.

$$\Delta E = E_{\text{FS}} - E_{\text{IS}} \quad (\text{S5})$$

$$E_{\text{a}} = \max(E_{\text{IS}}, E_{\text{FS}}, E_{\text{TS}}) - E_{\text{IS}} \quad (\text{S6})$$

$$E_{\text{TS,LSR}} = (1 - \alpha)E_{\text{IS}} + \alpha E_{\text{FS}} + \beta \quad (\text{S7})$$

$$\Delta \Delta Q_{\text{B}} = \Delta Q_{\text{B,FS}} - \Delta Q_{\text{B,IS}} \quad (\text{S8})$$

### Graph representation of the reaction network

The intermediate generation procedure keeps track of all the dehydrogenation reactions. Additionally, we also considered C-C, C-O, and C-OH bond breakings and formations. Then, each intermediate subgraph:

(1) is split into two different fragments (subgraphs) depending on the selected bond breaking,

(2) each generated fragment is compared with the subgraphs with matching elements from other families,

(3) if an equivalent structure is found, then the connection between the subgraphs is stored.

The information of the intermediates and their connections are then stored in a directed network graph, n-graph<sup>24</sup>. In this n-graph, the intermediates correspond to the nodes and the edges are the reactions.

## Supplementary Notes

### Note S1: On the analysis of the reaction network

We detail below the total number of intermediates and transition states that were computed explicitly by DFT. Originally, 463 intermediates were considered:

- 17 of them were  $C_1^{19,25}$ ,
- 55  $C_2^{15}$ ,
- 387  $C_3$ , and
- 4 that did not contain any C atom ( $H_2O$ ,  $OH$ ,  $O$ ,  $H$ ).

Among the  $C_1$ , 5, 8, and 4 came from the dehydrogenation of methane ( $CH_4$ ), methanol ( $CH_3OH$ ), and formic acid ( $HCOOH$ ) respectively.

Among the  $C_2$ , 10, 24, and 21 came from the networks of ethane, ethanol, and ethylene glycol respectively.

Among the  $C_3$ , 30 (28), 72 (70), 40 (28), 98 (83), 63 (61), and 84 (77) came from the dehydrogenation of propane, 1-propanol, 2-propanol, 1,2-propylene glycol, 1,3-propylene glycol, and glycerol respectively.

The numbers in parenthesis indicate the intermediates that converged to the desired structure. Thus, 40  $C_3$  intermediates did not converge, and the elementary steps associated were removed from the reaction network.

The 463 well-converged  $C_1$ – $C_3$  intermediates are interlinked by a network containing 2266 steps, out of which 604 (27%) were fully characterised *via* DFT. A total of 691 were C–C couplings. Among them, 55 and 636 were  $C_1$ – $C_1$  and  $C_1$ – $C_2$  couplings, respectively, that yield  $C_2$  and  $C_3$  intermediates ( $C_2$ : **Figure S5**,  $C_3$ : **Tables S16–S18**). Originally, we had considered that 10  $C_1$  and 70  $C_2$  moieties could combine to produce a  $C_3$  species. Nevertheless, as only 347 of 387  $C_3$  intermediates converged, only 636 (instead of 700) couplings were deemed possible. From them, 586 converged to the desired transition states. The remaining 114 are left void in **Tables S16–S18**. Further details about selected  $C_1$ – $C_2$  couplings are shown in **Table S19**.

Besides, there were 286 C–O and 301 C–OH bond-breaking reactions. 10 of them (5 C–O and 5 C–OH) were calculated using DFT-NEB (**Table S20**). Regarding hydrogenations, there were 683 C–H and 305 O–H bond formations, 8 of them (4 C–H and 4 O–H) computed *via* DFT-NEB (**Table S21**). The remaining hydrogenations were approximated *via* LSR, which have low error bars for hydrogenation processes as extensively shown in the literature and also since the TS energy is mainly assigned to the activation of H to on-top positions<sup>15,25,26</sup>, **Figure S7**. Heyrovsky-like variations were also considered for the 301 C–OH breakings and 305 O–H hydrogenations, **Note S5**.

### Note S2: Computing the transition states for the $C_1$ – $C_2$ bond formation

For each  $C_1$ – $C_2$  bond formation, we took the ground state of the  $C_3$  product as the final state. Then the initial states were approximated by separating the two moieties until the carbon atoms were at a distance of 3.5 Å. To avoid the molecules getting too close or too far to the surface, this elongation was made parallel to the xy plane, and both moieties were then shifted 0.2 Å down along z. These initial states were then relaxed during 30 steps to reduce tensions, but explicitly avoiding a full relaxation. Four images were generated for all reactions. Then, the

NEB algorithm was applied as implemented in VASP-VTST and analysed with the script of Prof. Henkelman's group<sup>8,27,28</sup>.

When the predicted transition state was at a distance  $\pm 10\%$  of a given image, we switched to CI-NEB. Else, we generated a new NEB by zooming the interval around the predicted maximum. Yet, for 117 reactions, the minimum-energy path was monotonously going down without a clear maximum. They are marked as \* in **Table S15**.

#### Note S3: Efficiency of automation in DFT

The explicit computation of transition states by density functional theory (DFT) is highly costly in terms of human hours, as close to 30% of all runs fail to converge when using automation<sup>29</sup>. This translates into 260-700 out of 2266 transition states requiring human intervention if all of them were to be calculated with DFT, even when using automated workflows for NEB calculations.

#### Note S4: Extension of the graph network for $C_{3+}$

Strategies proposed in this work can be extended for  $C_{3+}$  networks. However, as the number of reactions and intermediates exponentially increases with an increasing number of carbons, a screening process may be needed to handle the complexity of the network due to the massive computational resources needed to compute both intermediates and transition states with DFT. For example, for the  $C_4$  network, the number of intermediates increases from 463 to more than 700 and the number of transition states almost doubles from 2266 to more than 3900. In this work, we demonstrated that only a small domain of the reactivity graph is responsible for the selectivity for desired products, and thus, only this domain needs to be strongly evaluated *via* DFT. Hence, a thermodynamic exploration of the reaction intermediates, discarding the reactions highly endothermic (or in a second step with high energy barriers) and only evaluating key domains of the reaction graph may be the appropriate approach to explore  $C_{3+}$  networks.

#### Note S5: Heyrovsky and Tafel-like steps in energy profiles

When constructing the energy profiles, we considered that all hydrogenations occur from adsorbed  $H^*$ , in Tafel-like elementary steps, **Eq. S9**. However, to strip O or OH groups, one hydrogenation was considered to go through a Heyrovsky-like step, **Eq. S10-S11**, respectively. Specifically, we used the energies derived from **Eq. S12** for all figures dealing with  $C_3$  compounds (**Figure 2, 4, S10-S11** and **Tables S16-S18**), and **Eq. S13** for **Figure S4**.  $H^+$  is considered a reference value, and its DFT energy is set to 0 for the calculation of LSR.

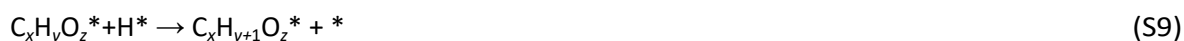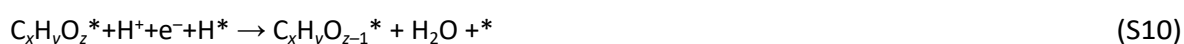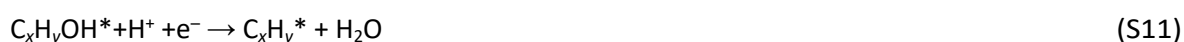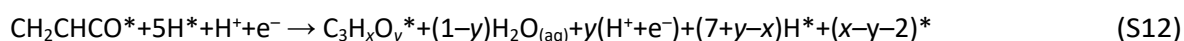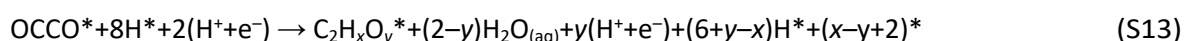



## Note S6: Charge Benchmarking

### Charge displacement obtained from dipole moments

As an alternative to Bader analysis, a proxy of the charge taken by an adsorbate upon adsorption can be deduced by the arising net electric dipole of the adsorbate-metal system,  $\vec{\mu}_{\text{tot}}$  in **Eq. S14**. We first decomposed such dipole into three components. The first one is intrinsic of the asymmetric slab model used in DFT,  $\vec{\mu}_*$ . The second one is intrinsic of the adsorbate A by excluding all perturbations caused by the surface,  $\vec{\mu}_A$ . Upon adsorption, the charge density taken by A from the surface ( $Q_{A^*} - Q_A$ ) creates a third contribution  $\vec{\mu}_{\text{ads}}$ , **Eq. S15**. Thus, the net charge transfer  $\Delta Q_d$  can be approximated from **Eq. S16**. Here  $z_A$  was obtained from the average height of all atoms in the adsorbate (C, H, O). while  $z_*$  is the position of the outermost Cu layer. The dipole moments were obtained from the Neugebauer and Scheffler corrections as given by VASP, applied along  $z^{30}$ . The net charge transfer obtained by this method is comparatively smaller than that obtained from Bader analysis by a factor of 0.24, **Figure S8**. The  $\frac{1}{4}$  factor was found by Lang and Kohn when describing the interaction of a punctual charge and its induced surface charge in the metal<sup>31</sup>.

$$\vec{\mu}_{\text{tot}} = \vec{\mu}_* + \vec{\mu}_A + \vec{\mu}_{\text{ads}} \quad (\text{S14})$$

$$\vec{\mu}_{\text{ads}} = (Q_{A^*} - Q_A)(z_A - z_*)\hat{z} \quad (\text{S15})$$

$$\Delta Q_d \equiv Q_{A^*} - Q_A = \frac{\|\vec{\mu}_{\text{tot}} - \vec{\mu}_* - \vec{\mu}_A\|}{z_A - z_*} \quad (\text{S16})$$

### Relation between Bader and Mulliken charges

Another proxy of the charge transferred upon adsorption is the increments in Mulliken charges,  $Q_M$ . Such quantity is calculated from the Mulliken charge around the atoms of the adsorbate, A, in the adsorbed structure ( $Q_{M,A@A^*}$ ) versus the same structure put in the gas phase ( $Q_{M,A,\text{gas}}$ ), **Eq. S17**. These values are prone to arbitrariness in the definition of the Wigner–Seitz radii ( $r_{\text{WS}}$ ). Here we took the default  $r_{\text{WS}}$  values included in the PAW files. **Figure S9** shows that increments in Mulliken charges underestimate Bader values, which is to be expected as the integration volume is significantly lower.

$$\Delta Q_M \equiv Q_{M,A@A^*} - Q_{M,A,\text{gas}} \quad (\text{S17})$$

## Note S7: Reaction conditions

The conditions of  $-0.95$  V vs. RHE and  $0.1$  M  $\text{KHCO}_3$  were chosen to maximize the Faradaic efficiency of multi-carbon products using oxide-derived copper from  $\text{CO}_2$ <sup>32</sup>. As for the co-reduction experiments, a mild potential of  $-0.40$  V vs. RHE was applied in a strongly alkaline pH ( $0.1$  M KOH). Such conditions have been linked to increased C–C coupling rates<sup>33</sup>.

As for the case of aldehydes, they undergo side reactions at alkaline pH, as demonstrated elsewhere<sup>34</sup>. For example, acetaldehyde is not stable in strongly alkaline pH, as it deprotonates to the ethenyloxy anion ( $\text{CH}_2\text{CHO}^-$ ) which in turn is reactive to competing pathways not leading to  $\text{C}_3$  products. Ethenyloxy undergoes aldol condensation with the remaining acetaldehyde to produce crotonaldehyde and 1-butanol. The aldehydes can also be hydrated to form diols, which are electrochemically inactive. Thus, for experiments where aldehydes

were used, a neutral pH buffer (PPB) was used as the supporting electrolyte. Additionally,  $-1.00$  V vs. RHE has also been identified as the optimal potential for propylene production from the co-reduction of formaldehyde and acetaldehyde, see **Table S3**.

#### **Note S8: Conformational Search**

Even simple  $C_2$ - $C_3$  adsorbates could have  $10^1$ - $10^2$  conformations. Thus, we followed a simplified conformational analysis based on the heuristic rules devised in ref. [25,35]. These rules can be summarised as follows:

- (i) The unsaturated bonds were placed close to the surface;
- (ii) Oxygen atoms were also placed close to the surface;
- (iii) Intermediates containing at least two oxygen atoms that can form intramolecular hydrogen bonds were put maximised their number of intramolecular hydrogen bonds;
- (iv) Carbon tails face the surface;
- (v) If the intermediate has cis-trans isomers, both were calculated, but only the most stable one was retained for subsequent analysis;
- (vi) If the intermediate did not converge to a reasonable structure (for instance, very unsaturated  $C_3$  structures generated cyclopropane analogues), the molecule was readjusted manually, trying up to 6 conformations that preserve the rules (i-iv).

#### **Note S9: Linear Scaling Relationships for $C_1$ - $C_2$ couplings**

All transition state energies were originally estimated using Linear Scaling Relationships (LSR) from **Table S15**. As derived from these values, **Eq. S18** approximates all activation energies as  $0.64$  eV for all C-C couplings. Due to this lack of sensitivity, all  $C_1$ - $C_2$  coupling reactions were calculated explicitly using the NEB method (**Note S1**).

$$E_{TS} = E_{C1} + E_{C2} + 0.64 \text{ eV} \quad (\text{S18})$$

## Supplementary Figures

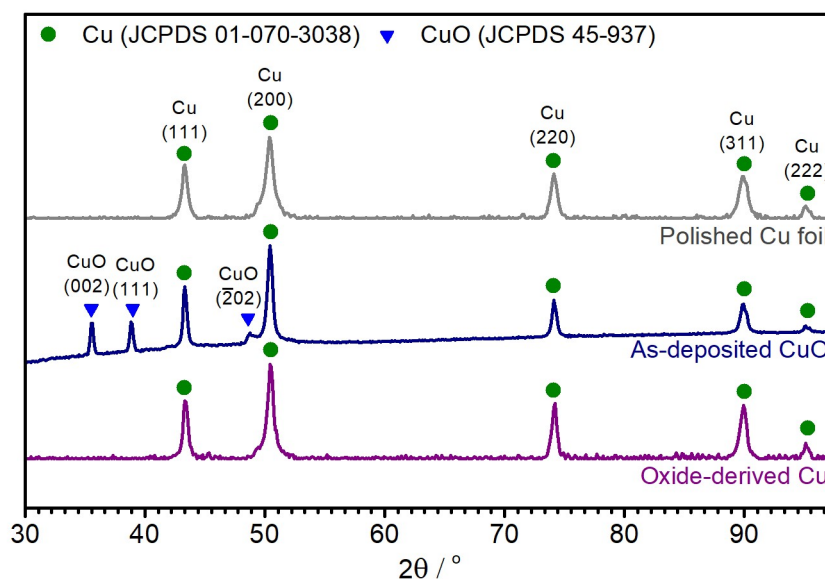

**Figure S1.** XRD patterns of as-deposited CuO (navy line) and OD-Cu (purple line). The peaks were assigned using standard XRD patterns JCPDS 01-070-3038 (Cu, green circle) and JCPDS 45-937 (CuO, blue triangle). The metallic Cu peaks in the as-deposited CuO come from the metallic Cu foil (grey line) used as the substrate for electrodeposition. The absence of CuO peaks in OD-Cu confirms that the oxide phase has been reduced to metallic Cu during pre-reduction.

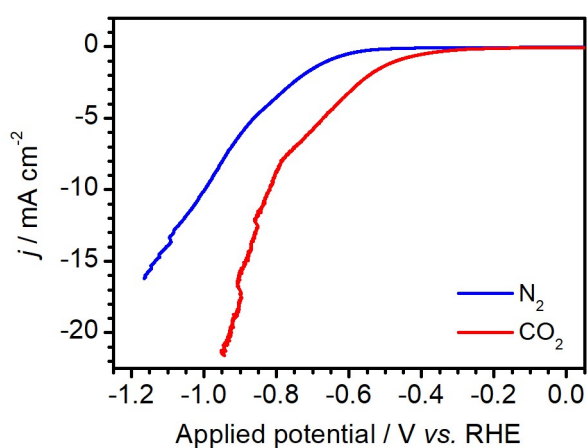

**Figure S2.** Linear sweep voltammograms of OD-Cu in  $N_2$  (blue) and  $CO_2$  (red) purged 0.1 M  $KHCO_3$ . The scan rate used was  $5 \text{ mV s}^{-1}$ . Note that in the  $CO_2$  purged electrolyte, the electroreduction current is larger than when  $N_2$  was the purging gas. This shows the activity of OD-Cu in catalysing  $eCO_2R$ .

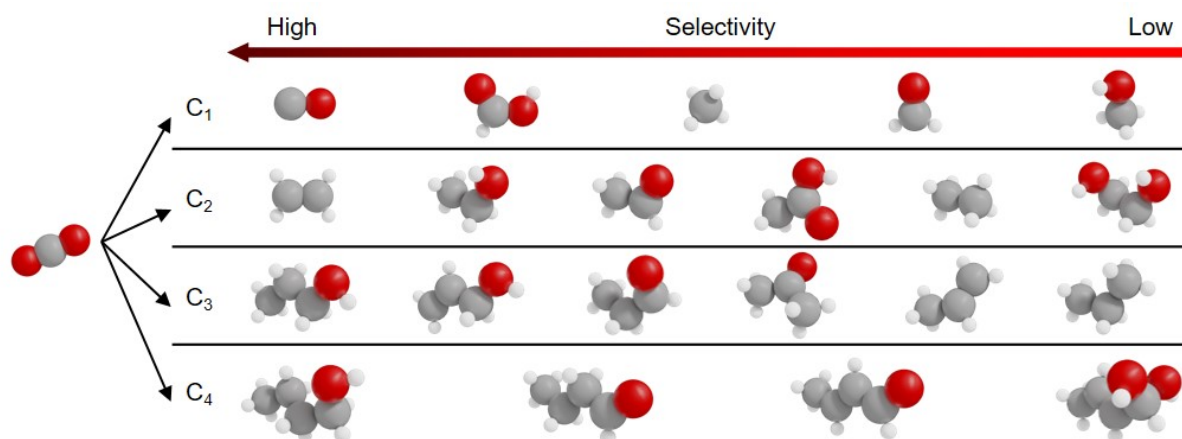

**Figure S3.** Overview of main  $C_1$  -  $C_4$  products in  $eCO_2R$  using copper-based catalysts<sup>33,34,36</sup>. Propylene ( $C_3H_6$ ) is observed at very low selectivity compared to 1-propanol ( $C_3H_7OH$ ). This is not a rigid classification, since observed selectivity trends are dependent on electrolysis conditions, especially for the case of  $C_1$  products.

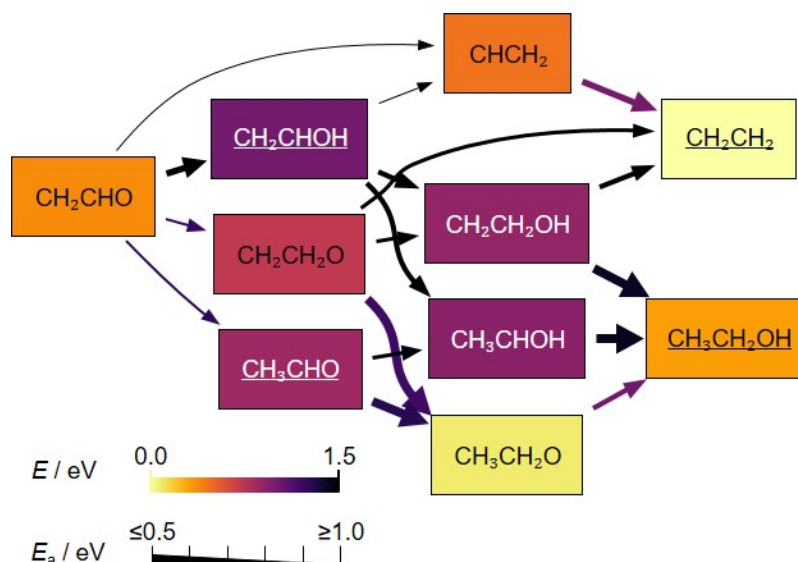

**Figure S4.** Energy profile for  $CH_2CHO$  hydrogenation to ethanol and ethylene at  $-0.4$  V vs. RHE. The boxes represent intermediates with the colour-code indicating their relative potential energies (Eq. S3). The thickness of the arrows is linked to their activation energies ( $E_a$ ), estimated from LSR. Underlined intermediates can also desorb into the solution.



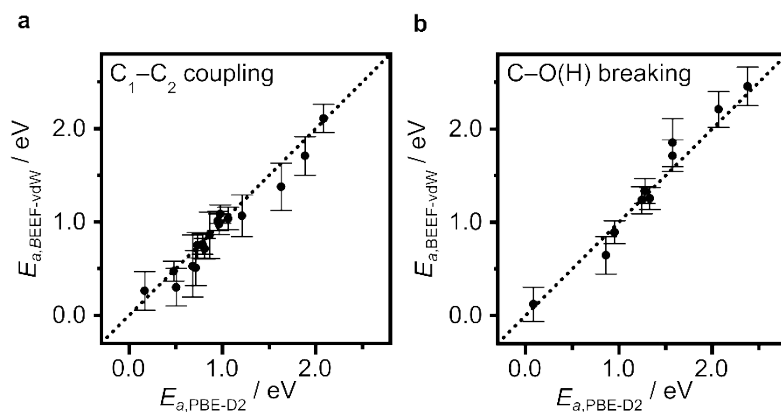

**Figure S6.** Parity plot of activation energies calculated with PBE-D2 vs. the corresponding values of BEEF-vdW including error bars for **a** C–C coupling and **b** C–O(H) breakings. PBE-D2 values taken from  $E_{a,DFT}$  in **Tables S19–S20**.

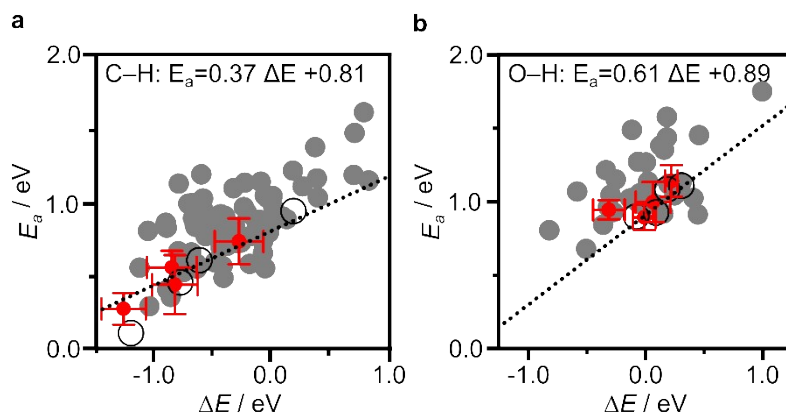

**Figure S7.** Linear-scaling relationships<sup>15</sup> for C–H and O–H hydrogenations (grey) compared to selected PBE-D2 (black) and BEEF-vdW values (red). The path selected was  $\text{CH}_2\text{CHCO} \rightarrow \text{CH}_2\text{CHCHO} \rightarrow \text{CH}_3\text{CHCHO} \rightarrow \text{CH}_3\text{CH}_2\text{CHO} \rightarrow \text{CH}_3\text{CH}_2\text{CH}_2\text{O}$  and the protonation of the later four. BEEF-vdW error bars in  $\Delta E$  and  $E_a$  are included.

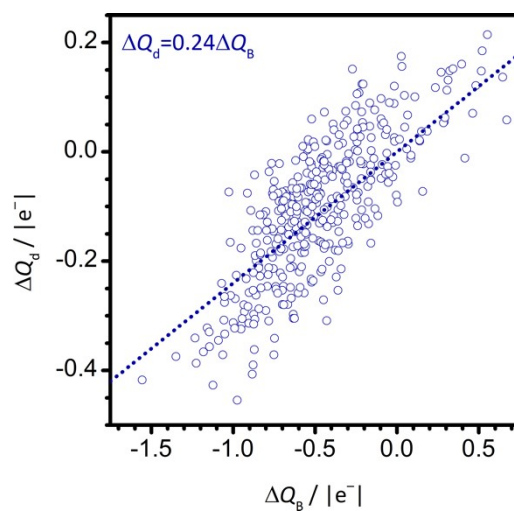

**Figure S8.** Parity plot of Bader charges vs. charges deduced from increments upon adsorption in the dipole moment along z. Best linear fit without independent term added as a guide to the eye.

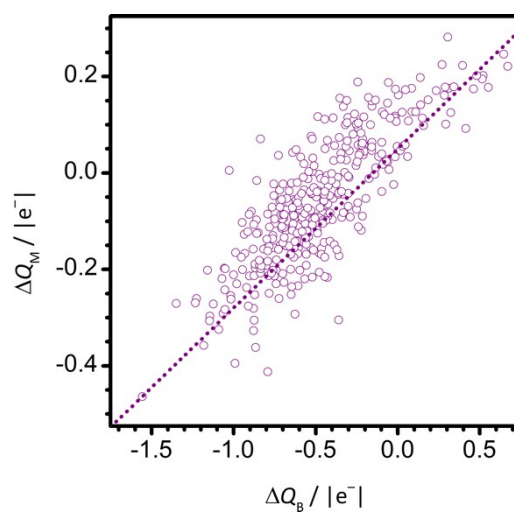

**Figure S9** Parity plot of Bader charges vs. Mulliken charges upon adsorption. Line added as a guide to the eye.

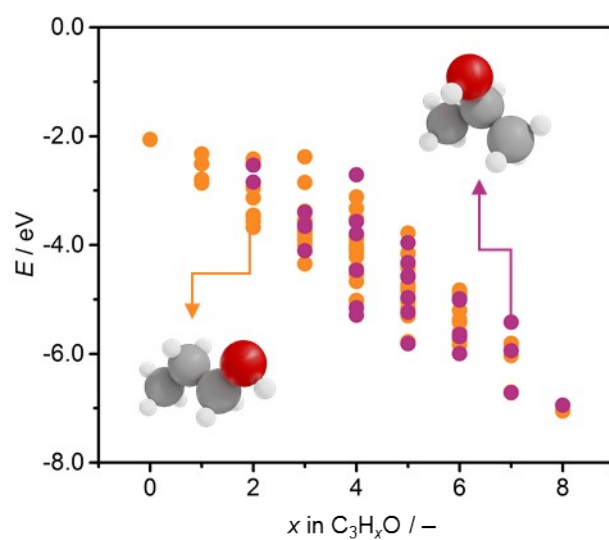

**Figure S10.** Energy of intermediates that share 1-propanol (orange) and 2-propanol (purple) backbones as a function of the number of hydrogens of the intermediate. For a given hydrogenation degree, the most stable intermediates of both backbones are comparable in energy.



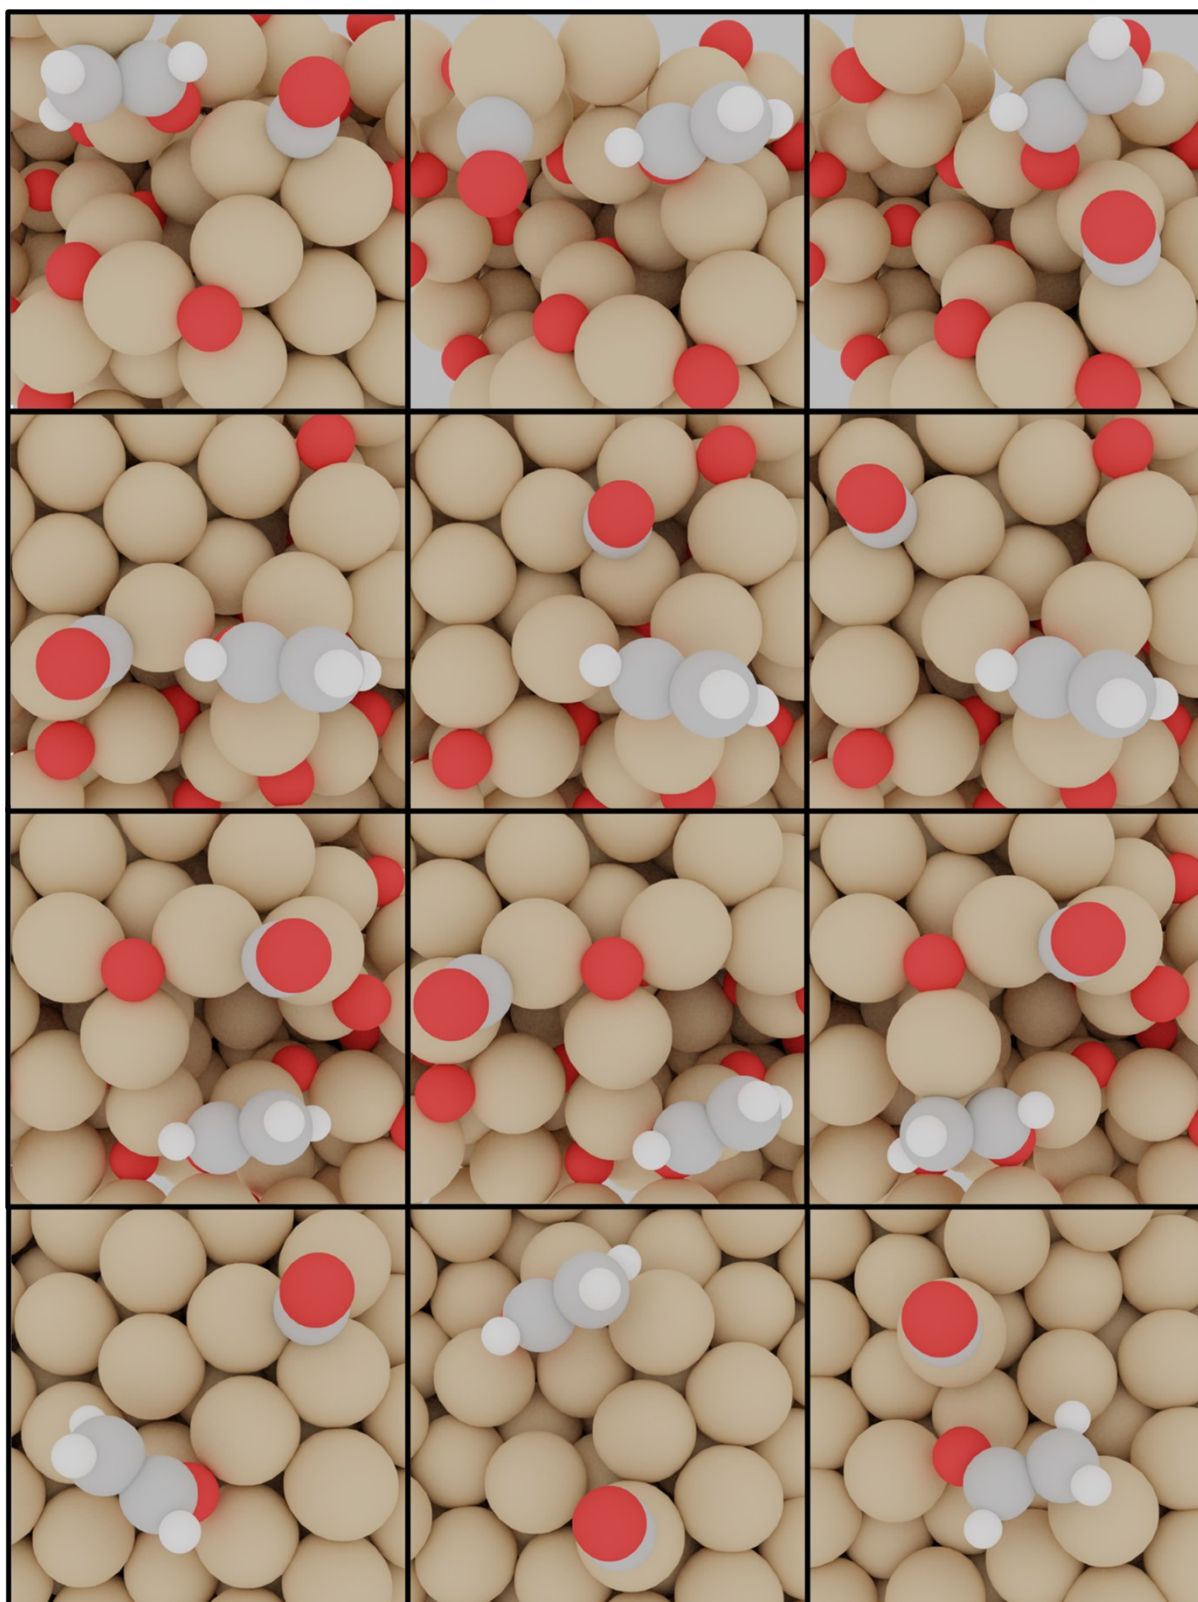

**Figure S11**  $\text{CH}_2\text{CHO-CO}$  coupling configurations on 12 structural motifs formed on oxide-derived Cu models.<sup>37,38</sup> The most suitable active site for promoting this step is reported in **Figure 3**.

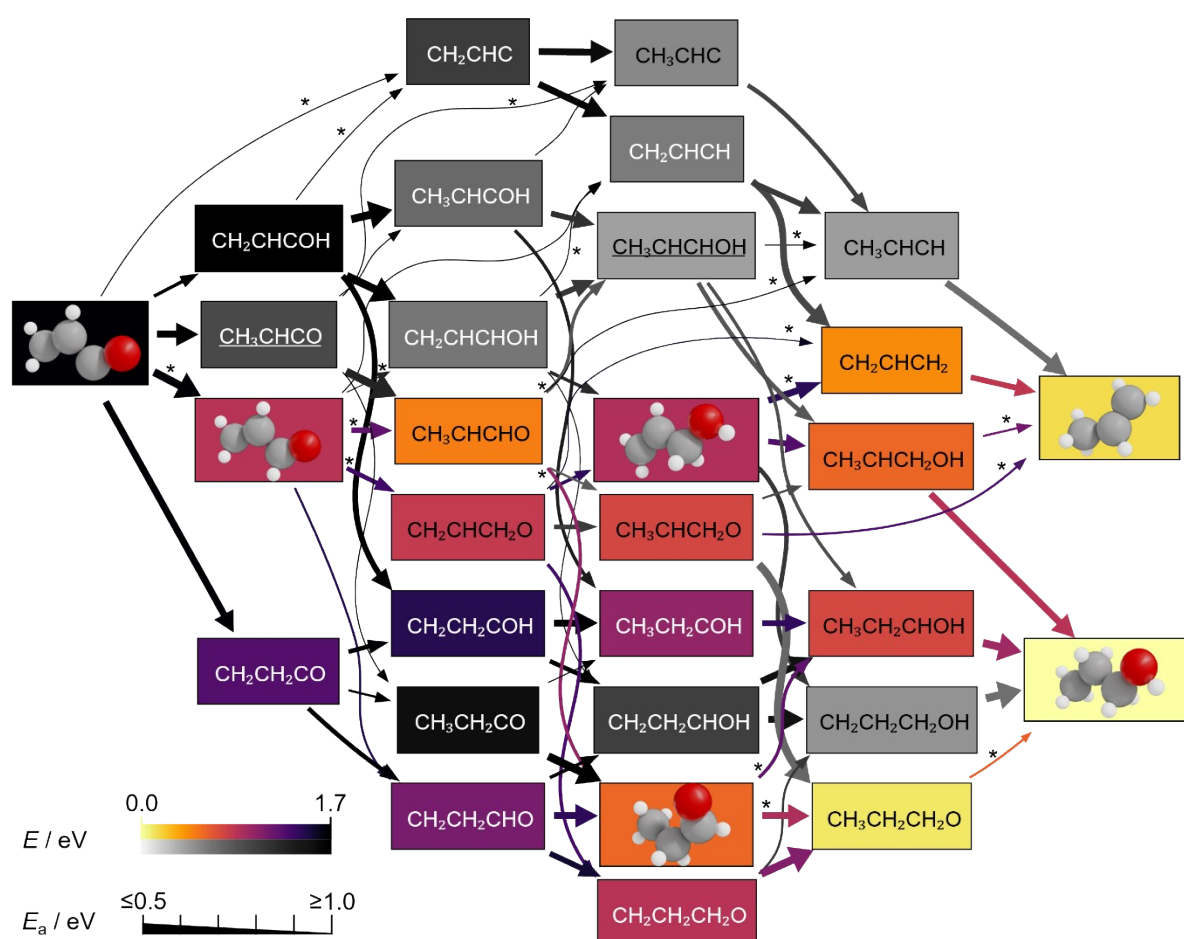

**Figure S12.** Energy profiles for hydrogenation of  $\text{CH}_2\text{CHCO}$  and  $\text{CH}_2\text{CHCHO}$  to propylene ( $\text{C}_3\text{H}_6$ ) and 1-propanol ( $\text{C}_3\text{H}_7\text{OH}$ ) at 0.0 V vs. RHE. The boxes represent intermediates with the colour-code indicating their relative potential energies (Eq. S3). Grayscale was used for the paths that are overall less favoured. The thickness of the arrows is linked to their activation energies ( $E_a$ ), estimated from LSR (those marked with \* correspond to explicitly calculated by DFT). Underlined intermediates can also desorb to the solution, among which, allyl alcohol ( $\text{C}_3\text{H}_5\text{OH}$ ) and propionaldehyde ( $\text{C}_3\text{H}_6\text{O}$ ) were used as reactants in experiments to probe theoretical predictions (Figure 5).

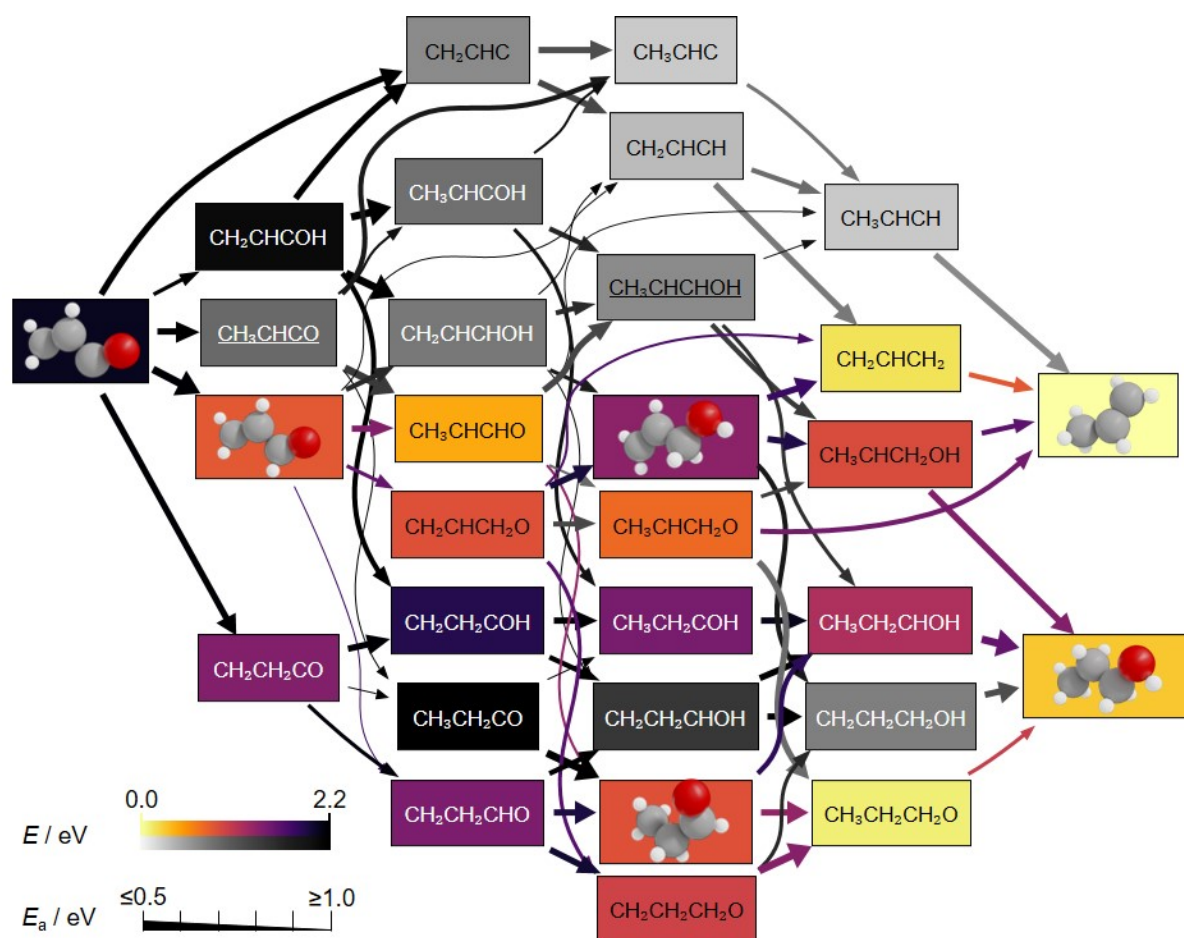

**Figure S13.** Energy profiles for hydrogenation of  $\text{CH}_2\text{CHCO}$  and  $\text{CH}_2\text{CHCHO}$  to propylene ( $\text{C}_3\text{H}_6$ ) and 1-propanol ( $\text{C}_3\text{H}_7\text{OH}$ ) at  $-0.4$  V vs. RHE. The boxes represent intermediates with the colour-code indicating their relative potential energies (Eq. S3). Grayscale was used for the paths that are overall less favoured. The thickness of the arrows is linked to their activation energies ( $E_a$ ). Underlined intermediates can also desorb to the solution, among which, allyl alcohol ( $\text{C}_3\text{H}_5\text{OH}$ ) and propionaldehyde ( $\text{C}_3\text{H}_6\text{O}$ ) were used as reactants in experiments to probe theoretical predictions (Figure 5).

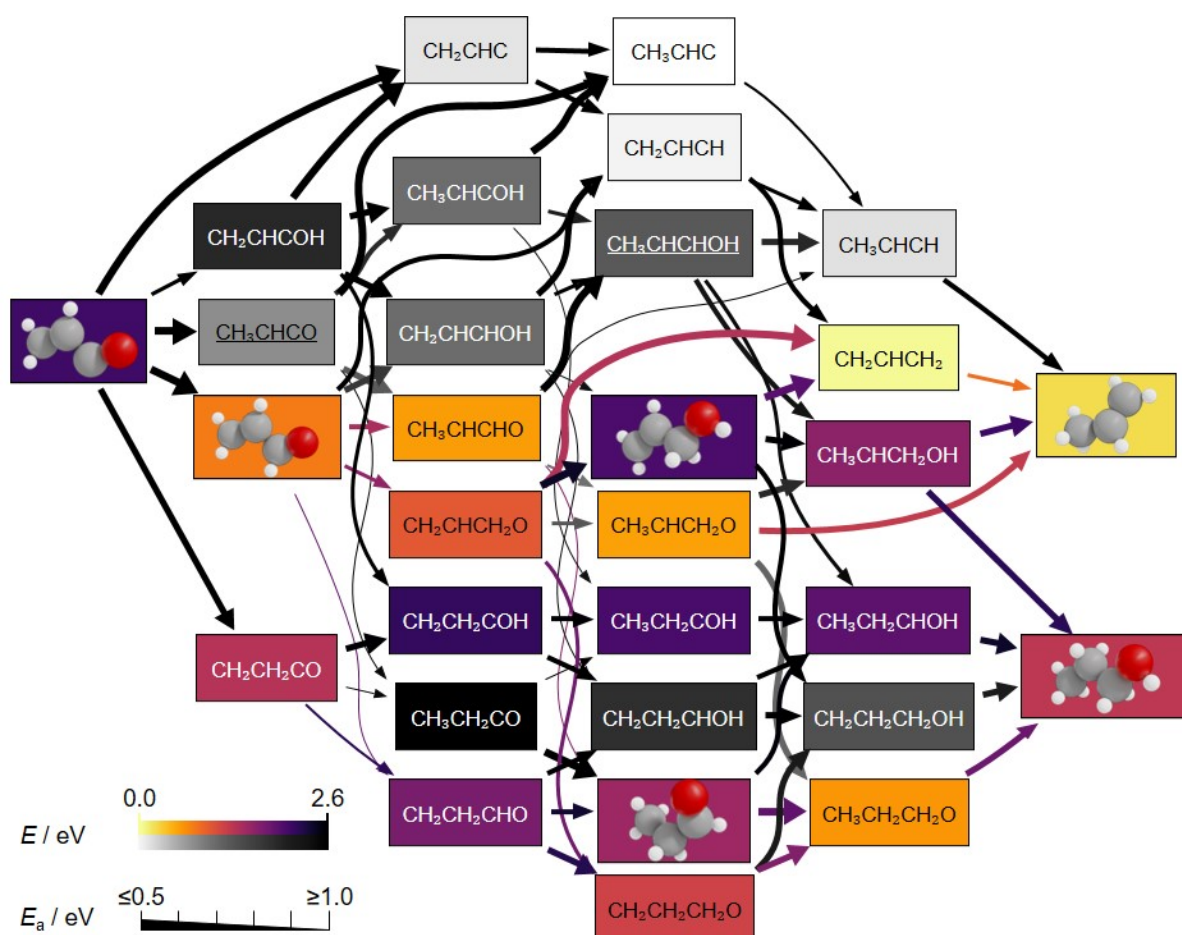

**Figure S14.** Energy profiles for hydrogenation of  $\text{CH}_2\text{CHCO}$  and  $\text{CH}_2\text{CHCHO}$  to propylene ( $\text{C}_3\text{H}_6$ ) and 1-propanol ( $\text{C}_3\text{H}_7\text{OH}$ ) at  $-1.0\text{ V}$  vs. RHE. The boxes represent intermediates with the colour-code indicating their relative potential energies (Eq. S3). Grayscale was used for the paths that are overall less favoured. The thickness of the arrows is linked to their activation energies ( $E_a$ ). Underlined intermediates among which, allyl alcohol ( $\text{C}_3\text{H}_5\text{OH}$ ) and propionaldehyde ( $\text{C}_3\text{H}_6\text{O}$ ) were used as reactants in experiments to probe theoretical predictions (Figure 5).



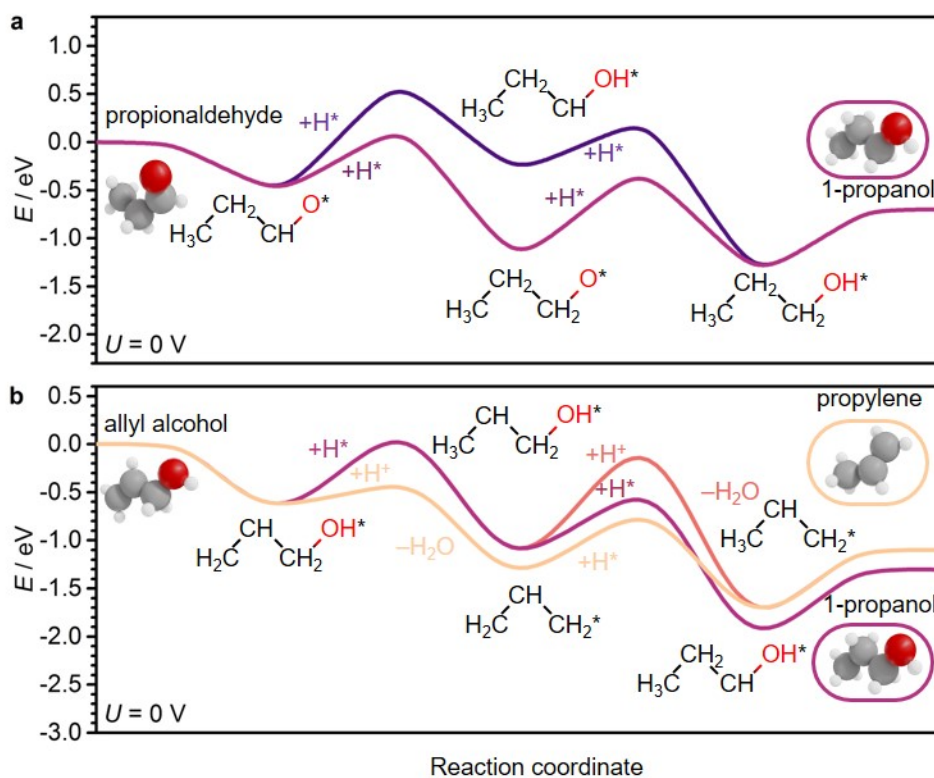

**Figure S15.** Energy profiles for electrocatalytic reduction of **a** propionaldehyde ( $\text{CH}_3\text{CH}_2\text{CHO}$ ), and **b** allyl alcohol ( $\text{CH}_2\text{CHCH}_2\text{OH}$ ) at 0.0 V vs. RHE on Cu(100), using  $\text{H}_2$ ,  $\text{CO}_2$ , and  $\text{H}_2\text{O}$  as thermodynamic sinks, and shifting the energy reference to make (a) propionaldehyde and (b) allyl alcohol the zero. Lighter colours are associated with more favoured reaction paths.



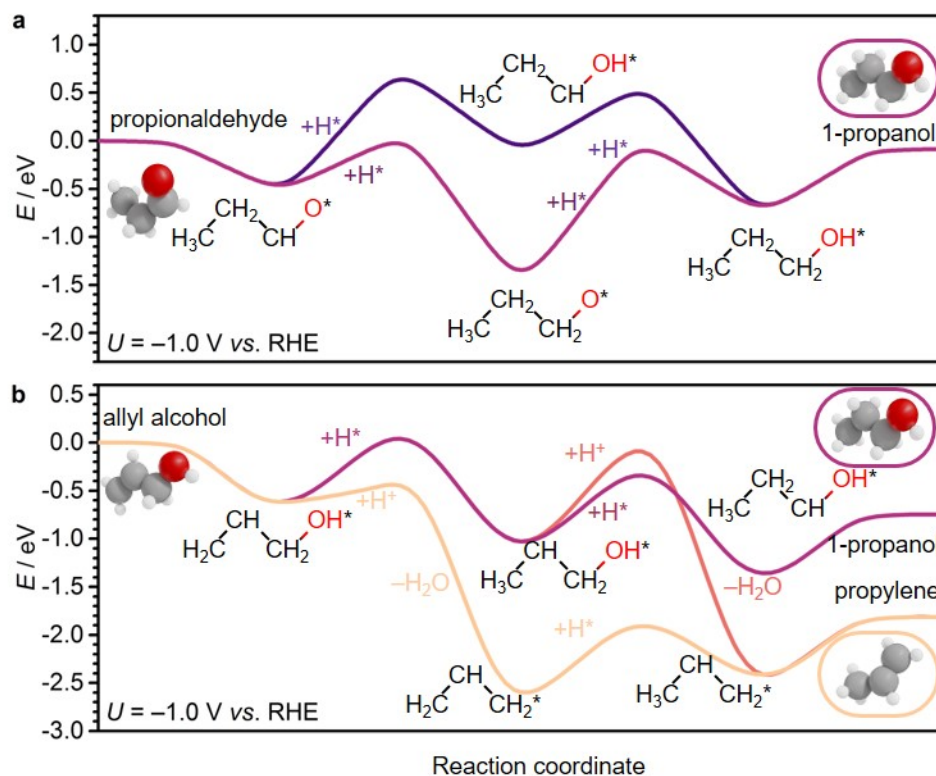

**Figure S17.** Energy profiles for electrocatalytic reduction of **a** propionaldehyde ( $CH_3CH_2CHO$ ), and **b** allyl alcohol ( $CH_2CHCH_2OH$ ) at  $-1.0 \text{ V vs. RHE}$  on Cu(100) using  $H_2$ ,  $CO_2$ , and  $H_2O$  as thermodynamic sinks, and shifting the energy reference to make (a) propionaldehyde and (b) allyl alcohol the zero. Lighter colours are associated with more favoured reaction paths.

## SUPPLEMENTARY TABLES

**Table S1.** Reaction enthalpies from CO<sub>2</sub> and H<sub>2</sub> to H<sub>2</sub>O(g) and relevant C<sub>2</sub>–C<sub>3</sub> products<sup>39</sup>. A more negative enthalpy indicates a more favourable formation of the product from CO<sub>2</sub> and H<sub>2</sub>.

| Product    | $\Delta H / \text{eV}$ |
|------------|------------------------|
| Ethylene   | –1.32                  |
| Ethanol    | –1.79                  |
| Propylene  | –2.59                  |
| 1-Propanol | –2.95                  |
| 2-Propanol | –3.12                  |

**Table S2.** Production rates (*r*), Faradaic efficiencies (*FE*) and geometric partial current densities (*j*) of products detected from the electrolysis of CO<sub>2</sub> (C<sub>1</sub> reagent) on OD-Cu in 0.1 M potassium bicarbonate at –0.95 V vs. RHE for 60 min. The values shown are an average taken from three experiments, with their standard deviations given in the brackets.

| Products        | <i>r</i> / $\mu\text{mol cm}^{-2} \text{h}^{-1}$ | <i>FE</i> / % | <i>j</i> / $\text{mA cm}^{-2}$ |
|-----------------|--------------------------------------------------|---------------|--------------------------------|
| Hydrogen        | 5710 (506)                                       | 37.4 (3.2)    | –5.3 (1.3)                     |
| Carbon monoxide | 182 (15)                                         | 1.17 (0.08)   | –0.17 (0.02)                   |
| Methane         | 47.5 (8.5) <sup>A</sup>                          | 1.3 (0.2)     | –0.19 (0.03)                   |
| Ethylene        | 819 (78)                                         | 30.5 (2.6)    | –4.4 (0.4)                     |
| Ethane          | –                                                | –             | –                              |
| Propylene       | –                                                | –             | –                              |
| Propane         | –                                                | –             | –                              |
| Methanol        | – <sup>A</sup>                                   | –             | –                              |
| Formate         | 1000 (97)                                        | 6.4 (2.0)     | –0.92 (0.28)                   |
| Ethanol         | 326 (28)                                         | 12.5 (1.0)    | –1.79 (0.16)                   |
| Acetaldehyde    | 18.8 (3.1)                                       | 0.61 (0.10)   | –0.09 (0.02)                   |
| Acetate         | 32.9 (7.1)                                       | 0.85 (0.24)   | –0.12 (0.04)                   |
| 1-Propanol      | 75.8 (16.3)                                      | 4.4 (1.1)     | –0.63 (0.13)                   |
| Propionaldehyde | 20.3 (1.4)                                       | 1.04 (0.05)   | –0.15 (0.10)                   |
| Acetone         | 3.2 (1.0)                                        | 0.16 (0.05)   | –0.03 (0.01)                   |
| Allyl alcohol   | 25.2 (3.9)                                       | 1.2 (0.2)     | –0.18 (0.06)                   |
| 1-Butanol       | –                                                | –             | –                              |

– Product not detected.

<sup>A</sup> Low rates to CH<sub>4</sub> and CH<sub>3</sub>OH hint low coverages for their precursors: CHOH, CH<sub>2</sub>O, CH<sub>2</sub>OH, CH<sub>3</sub>O and CH<sub>x</sub>.



**Table S3.** Faradaic efficiencies (*FE*) of products from the electrolysis of 50 mM formaldehyde + 50 mM acetaldehyde on OD-Cu in 0.1 M potassium phosphate buffer (pH 7) at different potentials for 60 min. The values shown are an average taken from three experiments.

| Relevant Products                              | Applied potential / V vs. RHE |              |              |              |
|------------------------------------------------|-------------------------------|--------------|--------------|--------------|
|                                                | −0.80                         | −0.90        | −1.00        | −1.10        |
| Hydrogen                                       | 25.8                          | 36.9         | 64.9         | 75.3         |
| Methane                                        | Not detected                  | 0.005        | 0.020        | 0.01         |
| Ethylene                                       | Not detected                  | Not detected | 0.004        | Not detected |
| Ethane                                         | Not detected                  | 0.007        | 0.06         | 0.002        |
| Propylene                                      | Not detected                  | Trace        | 0.005        | 0.0003       |
| Propane                                        | Not detected                  | Not detected | Trace        | Not detected |
| Methanol                                       | 26.3                          | 24.2         | 13.0         | 6.6          |
| Ethanol                                        | 43.6                          | 36.3         | 23.1         | 9.8          |
| Allyl alcohol                                  | Not detected                  | Not detected | 0.0030       | Not detected |
| 1-Butanol                                      | Not detected                  | 0.006        | 0.025        | 0.010        |
| <i>Total</i>                                   | <i>95.7</i>                   | <i>97.5</i>  | <i>101.1</i> | <i>91.8</i>  |
| Total current density<br>/ mA cm <sup>−2</sup> | −25.89                        | −36.0        | −61.9        | −188         |

**Table S4.** Production rates, in  $\mu\text{mol cm}^{-2} \text{ h}^{-1}$ , of liquid products formed at open circuit potential (OCP) and at  $-0.4 \text{ V vs. RHE}$  on OD-Cu in 0.1 M potassium hydroxide for 90 min. Production rates in  $\mu\text{mol cm}^{-2} \text{ h}^{-1}$  of liquid and gaseous products detected from the electrolysis of CO or formaldehyde (50 mM) at  $-1.0 \text{ V vs. RHE}$  on OD-Cu in 0.1 M potassium phosphate buffer (pH 7) for 60 min. Standard deviations are given in the brackets.

| Relevant products | Carbon monoxide |                          |                          | Formaldehyde             |
|-------------------|-----------------|--------------------------|--------------------------|--------------------------|
|                   | OCP             | $-0.4 \text{ V vs. RHE}$ | $-1.0 \text{ V vs. RHE}$ | $-1.0 \text{ V vs. RHE}$ |
| Hydrogen          | –               | –                        | 30468 (5840)             | 50490 (1888)             |
| Formate           | 1.61            | 0.13                     | –                        | –                        |
| Methane           | –               | – <sup>A</sup>           | 34.9 (5.0)               | 16.2 (0.5)               |
| Methanol          | –               | – <sup>A</sup>           | 4.6 (0.4)                | 8483 (529)               |
| Ethylene          | –               | –                        | 70.9 (15.8)              | –                        |
| Ethane            | –               | –                        | 0.15 (0.06)              | –                        |
| Ethanol           | 0.01            | 0.22                     | 26.5 (4.8)               | –                        |
| Acetate           | 0.19            | 0.30                     | –                        | –                        |
| Acetaldehyde      | 3.16            | trace                    | –                        | –                        |
| Propylene         | –               | –                        | –                        | –                        |
| Propionaldehyde   | 0.01            | –                        | –                        | –                        |
| Allyl alcohol     | –               | –                        | 2.1 (0.4)                | –                        |
| 1-Propanol        | 0.01            | 0.02                     | 2.2 (0.4)                | –                        |

– Product not detected or process not applicable.

<sup>A</sup> Low rates to  $\text{CH}_4$  and  $\text{CH}_3\text{OH}$  hint low coverages for their precursors:  $\text{CHOH}$ ,  $\text{CH}_2\text{O}$ ,  $\text{CH}_2\text{OH}$ ,  $\text{CH}_3\text{O}$  and  $\text{CH}_x$ .

**Table S5.** Production rates ( $r$ ) of products detected from the electrolysis of 50 mM acetaldehyde on OD-Cu in 0.1 M potassium phosphate buffer (pH 7) at  $-1.0$  V vs. RHE for 60 min. The values shown are an average taken from three experiments, with their standard deviations given in the brackets.

| Relevant Products | $r / \mu\text{mol cm}^{-2} \text{h}^{-1}$ |
|-------------------|-------------------------------------------|
| Hydrogen          | 16937 (1888)                              |
| Methane           | –                                         |
| Ethylene          | 34.3 (4.1)                                |
| Ethane            | 195 (27)                                  |
| Propylene         | –                                         |
| Methanol          | –                                         |
| Ethanol           | 13339 (962)                               |
| 1-Propanol        | –                                         |

– Product not detected or process not applicable.

**Table S6.** Production rates ( $r$ ) of products detected from the electrolysis of CO ( $\text{C}_1$  reagent) with 50 mM acetaldehyde ( $\text{C}_2$  reagent) on OD-Cu in 0.1 M potassium phosphate buffer (pH 7) at  $-1.0$  V vs. RHE for 60 min. The values shown are an average taken from three experiments, with their standard deviations given in the brackets.

| Relevant Products | $r / \mu\text{mol cm}^{-2} \text{h}^{-1}$ |
|-------------------|-------------------------------------------|
| Hydrogen          | 15189 (5911)                              |
| Methane           | 17.0 (4.6)                                |
| Ethylene          | 105 (8)                                   |
| Ethane            | 0.26 (0.03)                               |
| Propylene         | Trace                                     |
| Methanol          | –                                         |
| Ethanol           | 9842 (2578)                               |
| 1-Propanol        | 12.1 (3.8)                                |
| 1-Butanol         | 0.4 (0.1)                                 |

– Product not detected or process not applicable.

**Table S7.** Production rates ( $r$ ), Faradaic efficiencies ( $FE$ ) and geometric partial current densities ( $j$ ) of products detected from the electrolysis of 50 mM formaldehyde ( $C_1$  reagent) and 50 mM acetaldehyde ( $C_2$  reagent) on OD-Cu in 0.1 M potassium phosphate buffer (pH 7) at  $-1.0$  V vs. RHE for 60 min. The values shown are an average taken from three experiments, with their standard deviations given in the brackets. We note that 1-propanol and acetone were not detected by headspace GC, while propane was qualitatively detected by GC. Results from control electrolysis experiments of formaldehyde (**Table S4**) or acetaldehyde (**Table S5**) allowed us to conclude that  $C_1$  products originated from formaldehyde,  $C_2$  and  $C_4$  products from acetaldehyde, and  $C_3$  products from the combination of both reactants. The  $FE$  and  $j$  values were calculated based on the number of electrons transferred from the respectively elucidated reactants.

| Relevant Products | $r / \mu\text{mol cm}^{-2} \text{ h}^{-1}$ | $FE / \%$                      | $j / \text{mA cm}^{-2}$ |
|-------------------|--------------------------------------------|--------------------------------|-------------------------|
| Hydrogen          | 39963 (2732)                               | 64.9 (0.6)                     | $-40.2$ (2.7)           |
| Methane           | 6.4 (0.4)                                  | 0.020 (0.001)                  | $-0.0120$ (0.0001)      |
| Ethylene          | 2.9 (0.3)                                  | 0.004 (0.001)                  | $-0.003$ (0.001)        |
| Ethane            | 20.4 (1.6)                                 | 0.06 (0.01)                    | $-0.037$ (0.009)        |
| Propylene         | 1.4 (0.6)                                  | 0.005 (0.001)                  | $-0.003$ (0.001)        |
| Propane           | Trace                                      | Trace                          | Trace                   |
| Methanol          | 8969 (611)                                 | 13.0 (1.6)                     | $-8.0$ (0.5)            |
| Ethanol           | 16005 (752)                                | 23.1 (0.3)                     | $-14.3$ (0.7)           |
| Allyl alcohol     | 2.0 (0.4)                                  | 0.0030 (0.0004)                | $-0.0020$ (0.0004)      |
| 1-Butanol         | 8.8 (0.5)                                  | 0.025 ( $1.5 \times 10^{-7}$ ) | $-0.016$ (0.001)        |

**Table S8.** Production rates, in  $\mu\text{mol cm}^{-2} \text{h}^{-1}$ , of products formed under open circuit in 0.1 M potassium hydroxide in the presence of OD-Cu for 90 min upon bubbling carbon monoxide as  $\text{C}_1$  reagent in the presence of  $\text{C}_2$  reagents. Oxalate cannot be detected by  $^1\text{H}$  NMR. Methanol and propanol were not detected by  $^1\text{H}$  NMR. Propylene was not detected by headspace GC-MS.

| Relevant products | $\text{C}_2$ reagents (50 mM) |                 |         |         |         |
|-------------------|-------------------------------|-----------------|---------|---------|---------|
|                   | Glyoxal                       | Ethylene glycol | Oxalate | Acetate | Ethanol |
| Glyoxal           | –                             | 0.12            | –       | –       | 2.22    |
| Ethylene glycol   | 23.58                         | –               | 0.63    | 7.24    | –       |
| Acetate           | 0.13                          | 0.05            | 32.57   | –       | 0.05    |
| Ethanol           | –                             | 1.04            | –       | 0.12    | –       |
| Formate           | 3.06                          | 0.67            | 1.09    | 1.35    | 1.36    |
| Acetaldehyde      | 0.11                          | –               | –       | –       | –       |

– Product not detected or process not applicable.

**Table S9.** Production rates, in  $\mu\text{mol cm}^{-2} \text{h}^{-1}$ , of products formed at  $-0.4 \text{ V}$  vs. RHE on OD-Cu in 0.1 M potassium hydroxide for 90 min upon bubbling carbon monoxide as  $\text{C}_1$  reagent in the presence of  $\text{C}_2$  reagents. Oxalate cannot be detected by  $^1\text{H}$  NMR. Propylene was not detected by headspace GC-MS.

| Relevant products | $\text{C}_2$ reagents (50 mM) |                 |         |         |         |
|-------------------|-------------------------------|-----------------|---------|---------|---------|
|                   | Glyoxal                       | Ethylene glycol | Oxalate | Acetate | Ethanol |
| Glyoxal           | –                             | 0.22            | 5.83    | 0.14    | –       |
| Ethylene glycol   | 27.86                         | –               | 0.49    | 0.09    | –       |
| Acetate           | 4.53                          | 0.45            | 0.26    | –       | 2.10    |
| Ethanol           | 0.89                          | 1.40            | 0.34    | 0.21    | –       |
| Methanol          | 0.05                          | 0.07            | –       | 0.03    | 0.03    |
| Formate           | 3.16                          | 1.44            | 1.08    | 1.04    | 1.97    |
| Acetaldehyde      | 0.13                          | –               | –       | –       | –       |
| 1-Propanol        | 0.15                          | 0.25            | 0.22    | 0.12    | 0.12    |

– Product not detected or process not applicable.

**Table S10.** Production rates, in  $\mu\text{mol cm}^{-2} \text{h}^{-1}$ , of products formed under open circuit in 0.1 M potassium hydroxide in the presence of OD-Cu for 90 min upon addition of formaldehyde (50 mM) as  $\text{C}_1$  reagent in the presence of  $\text{C}_2$  reagents. Oxalate cannot be detected by  $^1\text{H}$  NMR. Propylene was not detected by headspace GC-MS.

| Relevant products | $\text{C}_2$ reagents (50 mM) |                 |         |         |         |
|-------------------|-------------------------------|-----------------|---------|---------|---------|
|                   | Glyoxal                       | Ethylene glycol | Oxalate | Acetate | Ethanol |
| Glyoxal           | –                             | –               | 0.40    | 0.37    | 0.25    |
| Ethylene glycol   | 29.17                         | –               | 0.45    | 0.41    | –       |
| Acetate           | 0.28                          | 0.46            | 0.20    | –       | 0.16    |
| Ethanol           | 0.09                          | –               | 0.13    | 0.00    | –       |
| Methanol          | 90.20                         | 171.96          | 74.43   | 139.17  | 104.75  |
| Formate           | 13.12                         | 89.25           | 7.36    | 79.12   | 37.55   |
| Acetaldehyde      | 0.20                          | –               | 0.38    | –       | –       |
| 1-Propanol        | 0.01                          | –               | 0.10    | –       | –       |

– Product not detected or process not applicable.

**Table S11.** Production rates, in  $\mu\text{mol cm}^{-2} \text{h}^{-1}$ , of products formed at  $-0.4 \text{ V}$  vs. RHE on OD-Cu in 0.1 M potassium hydroxide for 90 min upon addition of formaldehyde (50 mM) as  $\text{C}_1$  reagent in the presence of  $\text{C}_2$  reagents. Oxalate cannot be detected by  $^1\text{H}$  NMR. 1-Propanol was not detected by  $^1\text{H}$  NMR. Propylene was not detected by headspace GC-MS.

| Relevant products | $\text{C}_2$ reagents (50 mM) |                 |         |         |         |
|-------------------|-------------------------------|-----------------|---------|---------|---------|
|                   | Glyoxal                       | Ethylene glycol | Oxalate | Acetate | Ethanol |
| Glyoxal           | –                             | –               | 0.38    | 0.36    | 0.37    |
| Ethylene glycol   | 20.47                         | –               | 0.33    | 0.62    | –       |
| Acetate           | 0.17                          | 1.21            | 0.24    | –       | 0.22    |
| Ethanol           | 0.10                          | –               | 0.09    | –       | –       |
| Methanol          | 376.78                        | 123.83          | 212.24  | 176.96  | 207.21  |
| Formate           | 12.20                         | 148.57          | 51.46   | 30.49   | 23.05   |
| Acetaldehyde      | 0.14                          | –               | –       | –       | –       |

– Product not detected or process not applicable.

**Table S12.** Production rates, in  $\mu\text{mol cm}^{-2} \text{h}^{-1}$ , of products formed under open circuit in 0.1 M potassium hydroxide in the presence of OD-Cu for 90 min upon addition of methanol (50 mM) as  $\text{C}_1$  reagent in the presence of  $\text{C}_2$  reagents. Oxalate cannot be detected by  $^1\text{H}$  NMR. Propylene was not detected by headspace GC-MS.

| Relevant products | $\text{C}_2$ reagents (50 mM) |                 |         |         |         |
|-------------------|-------------------------------|-----------------|---------|---------|---------|
|                   | Glyoxal                       | Ethylene glycol | Oxalate | Acetate | Ethanol |
| Glyoxal           | –                             | –               | 1.69    | –       | –       |
| Ethylene glycol   | 39.61                         | –               | 0.10    | –       | –       |
| Acetate           | 0.25                          | 0.07            | 0.09    | –       | 0.05    |
| Ethanol           | 0.11                          | –               | 0.05    | 0.03    | –       |
| Formate           | 4.83                          | –               | 0.08    | –       | –       |
| Acetaldehyde      | 0.22                          | –               | 0.39    | –       | –       |
| 1-Propanol        | 0.15                          | –               | 0.10    | 0.01    | –       |

– Product not detected or process not applicable.

**Table S13.** Production rates, in  $\mu\text{mol cm}^{-2} \text{h}^{-1}$ , of products formed on OD-Cu at  $-0.4 \text{ V}$  vs. RHE in 0.1 M potassium hydroxide for 90 min upon addition of methanol (50 mM) as  $\text{C}_1$  reagent in the presence of  $\text{C}_2$  reagents. Oxalate cannot be detected by  $^1\text{H}$  NMR. Propylene was not detected by headspace GC-MS.

| Relevant products | $\text{C}_2$ reagents (50 mM) |                 |         |         |         |
|-------------------|-------------------------------|-----------------|---------|---------|---------|
|                   | Glyoxal                       | Ethylene glycol | Oxalate | Acetate | Ethanol |
| Glyoxal           | –                             | –               | 0.04    | –       | –       |
| Ethylene glycol   | 26.44                         | –               | –       | –       | –       |
| Acetate           | 0.12                          | 0.15            | 0.05    | –       | 0.07    |
| Ethanol           | 0.08                          | –               | 0.01    | –       | –       |
| Formate           | 2.35                          | 0.34            | 0.16    | 0.05    | 0.25    |
| Acetaldehyde      | 0.14                          | –               | 0.25    | –       | –       |
| 1-Propanol        | 0.08                          | –               | 0.09    | –       | –       |

– Product not detected or process not applicable.

**Table S14.** Concentrations and resulting background production rates of relevant impurities found in 50 mM solutions prepared with commercial glyoxal and sodium oxalate used for experiments reflected in **Tables S8-S13**.

|                   | Glyoxal | Oxalate | Glyoxal                                    | Oxalate                                    |
|-------------------|---------|---------|--------------------------------------------|--------------------------------------------|
| Relevant products | C / mM  | C / mM  | $r / \mu\text{mol cm}^{-2} \text{ h}^{-1}$ | $r / \mu\text{mol cm}^{-2} \text{ h}^{-1}$ |
| Ethylene glycol   | 3.830   | 0.000   | 41.69                                      | 0.00                                       |
| Acetate           | 0.075   | 0.070   | 0.82                                       | 0.76                                       |
| Ethanol           | 0.020   | –       | 0.22                                       | –                                          |
| Methanol          | –       | –       | –                                          | –                                          |
| Formate           | 0.330   | 0.075   | 3.59                                       | 0.82                                       |
| Acetaldehyde      | 0.020   | –       | 0.22                                       | –                                          |
| 1-Propanol        | –       | –       | –                                          | –                                          |

– Product not detected or process not applicable.

**Table S15.** Values of  $\alpha$  and  $\beta$  in **Eq. S5** used to approximate the energies of transition states,  $E_{\text{TS}}$ , for O–H and C–H hydrogenations. Taken from Supplementary Tables 8-9 in Ref. [15]. We selected the LSR with the lowest MAE on Cu: BEP for O–H and C–H breakings. Parameters for C–C, C–O, and C–OH, although not used in this work, are also shown for completeness.  $(1-\alpha)$  values that describe bond formations are shown as a reference.

| Bond breaking       | O–H  | C–H  | C–C  | C–O  | C–OH |
|---------------------|------|------|------|------|------|
| $\alpha / -$        | 0.39 | 0.63 | 1.00 | 1.00 | 1.00 |
| $(1-\alpha) / -$    | 0.61 | 0.37 | 0.00 | 0.00 | 0.00 |
| $\beta / \text{eV}$ | 0.89 | 0.81 | 0.64 | 1.24 | 1.48 |

BEP: Brønsted-Evans-Polanyi, FSS: Final-State Scaling. MAE: Mean Absolute Error.



**Table S16.** Reaction energies,  $\Delta E$  (Eq. S3) in eV, for  $C_1$ – $C_2$  couplings. Exothermic values indicate larger thermodynamic driving forces to the corresponding  $C_3$  products. The (–) marks the direction in which the C–C bond is formed. Void boxes indicate unstable  $C_3$  species. Thicker lines cluster  $C_1$  and  $C_2$ .

|                                   | –C    | –CH   | –CH <sub>2</sub> | –CH <sub>3</sub> | –CO   | –COH  | –CHO  | –CHOH | –CH <sub>2</sub> O | –CH <sub>2</sub> OH |
|-----------------------------------|-------|-------|------------------|------------------|-------|-------|-------|-------|--------------------|---------------------|
| CC                                | -0.66 | -0.83 | -1.06            | -1.08            | 0.04  | -0.70 | -1.15 | -1.16 | -0.77              | -1.27               |
| CHC                               | -0.87 | -0.38 | -1.00            | -0.94            | 0.12  | -0.06 | -0.93 | -0.95 | 0.33               | 0.18                |
| CH <sub>2</sub> C                 | -0.82 | -0.72 | -1.05            | -0.73            | -0.17 | -0.67 | -0.68 | -0.49 | -0.46              | -0.62               |
| CH <sub>3</sub> C                 | -1.14 | -0.96 | -1.03            | -0.27            | -0.32 | -1.12 | -1.38 | -1.31 | 0.14               | -0.54               |
| CCH                               | -0.21 | -0.32 | -0.87            | -0.85            | 0.40  | 0.01  | -1.15 | -1.21 | -0.72              | -0.92               |
| CHCH                              | -0.53 | -0.45 | -1.01            | -0.61            | 0.08  | -0.57 | -0.84 | -0.87 | -0.25              | -0.79               |
| CH <sub>2</sub> CH                | -0.93 | -0.87 | -1.50            | -1.17            | 0.25  | -0.41 | -1.52 | -1.57 | -1.14              | -1.09               |
| CH <sub>3</sub> CH                | -1.56 | -1.11 | -1.82            | -1.07            | -0.36 | -1.33 | -1.98 | -1.88 | -1.16              | -1.46               |
| CCH <sub>2</sub>                  | 0.49  |       | -0.51            | -0.88            |       | 0.54  | -0.74 | -0.44 | -0.35              | -1.03               |
| CHCH <sub>2</sub>                 |       | 0.38  | -0.42            | -0.42            | 0.52  | 0.10  | -0.38 | -0.19 | -0.24              | -0.60               |
| CH <sub>2</sub> CH <sub>2</sub>   | -0.13 | 0.30  | -0.48            | -0.49            | 0.38  | -0.02 | -0.41 | -0.32 | -0.33              | -0.62               |
| CH <sub>3</sub> CH <sub>2</sub>   | -1.18 | -0.38 | -1.17            | -1.36            | 0.91  | -0.60 | -1.15 | -1.05 | -1.36              | -1.59               |
| COC                               | 0.24  | 0.36  | -0.21            | -0.06            | 1.53  | 0.37  | -0.25 | 0.35  | 0.48               | 0.28                |
| COHC                              | -0.77 | -0.09 | -0.99            | -1.14            | 0.10  | 0.30  | -0.50 | -1.02 | -0.66              | -1.07               |
| CHOC                              | -0.99 | -0.73 | -0.77            | -1.17            | -0.30 | -0.28 | -1.67 | -1.15 | -0.51              | -1.32               |
| CHOHC                             | -0.43 | -0.19 | -0.01            | -0.54            | 0.87  | -0.23 | -0.59 | 0.50  | -0.45              | -0.17               |
| CH <sub>2</sub> OC                | -1.68 | -0.54 | -1.61            | -0.71            | -0.64 | -1.50 | -1.58 | -2.08 |                    | -1.24               |
| CH <sub>2</sub> OHC               | -1.16 | 0.32  | -0.75            | -0.37            | 0.18  | -0.90 | -1.37 | -0.78 | -0.22              | 0.06                |
| COCH                              | -0.16 | -0.27 | -0.25            | -0.21            | 0.92  | 1.01  | 0.17  | -0.77 | 0.42               | 0.13                |
| COHCH                             | -0.01 | -0.38 | -0.38            | -0.65            | 1.55  | 1.26  |       | -0.34 | 0.00               | -0.40               |
| CHOCH                             | -0.78 | -0.26 | -1.09            | -0.91            | 1.10  |       | -0.61 | -0.68 | -0.49              | -0.76               |
| CHOHCH                            | -0.89 | -0.34 | -1.19            | -0.85            | 0.11  | 0.01  | -0.73 | -0.89 | -0.41              | -0.65               |
| CH <sub>2</sub> OCH               | -1.87 | -1.18 | -2.22            | -1.59            | -0.16 | -1.12 | -2.00 | -1.88 | -1.37              | -1.56               |
| CH <sub>2</sub> OHCH              | -1.38 | -1.04 | -1.49            | -1.21            | 0.23  | -0.84 | -1.59 | -1.44 | -0.88              | -1.11               |
| COCH <sub>2</sub>                 |       | -0.16 | -1.02            | 0.18             | 0.52  | 0.04  | -0.37 | -0.49 | 0.79               | 0.33                |
| COHCH <sub>2</sub>                | 0.42  | 0.32  | -0.52            | -0.42            | 0.94  | 0.57  | 0.23  | -0.09 | 0.03               | -0.43               |
| CHOCH <sub>2</sub>                | -0.14 | 0.55  | -0.20            | -0.26            | 1.24  | 0.94  | 0.40  | 0.36  | -0.03              | -0.18               |
| CHOHCH <sub>2</sub>               | -0.01 | 0.59  | -0.26            | -0.31            | 0.97  | 0.47  | 0.21  | -0.17 | 0.58               | 0.53                |
| CH <sub>2</sub> OCH <sub>2</sub>  | -0.56 | -0.11 | -0.92            | -1.27            | 1.60  | -0.06 | -0.83 | -0.06 | -1.02              | -1.15               |
| CH <sub>2</sub> OHCH <sub>2</sub> | -1.00 | -0.23 | -0.97            | -1.27            | 1.38  | -0.28 | -0.74 | 0.12  | -0.91              | -1.24               |

Continues on next page.

**Table S16.** Continues from the previous page.

|                         | -C    | -CH   | -CH <sub>2</sub> | -CH <sub>3</sub> | -CO   | -COH  | -CHO  | -CHOH | -CH <sub>2</sub> O | -CH <sub>2</sub> OH |
|-------------------------|-------|-------|------------------|------------------|-------|-------|-------|-------|--------------------|---------------------|
| CCO-                    |       |       | 0.51             | 0.18             |       | 1.63  | 0.79  | 0.95  | 0.66               | 0.30                |
| CHCO-                   |       | 0.67  | -0.26            | -0.82            |       | 1.72  | -0.28 | -0.16 | 0.08               | -0.61               |
| CH <sub>2</sub> CO-     | -0.47 | -0.44 | -1.87            | -1.46            | 0.04  | -0.47 | -1.19 | -1.39 | -0.82              | -1.28               |
| CH <sub>3</sub> CO-     | -0.91 | -1.11 | -1.57            | -0.82            | 0.32  | -0.86 | -1.06 | -1.13 | -0.57              | -0.69               |
| CCOH-                   |       |       | -0.79            | -0.93            |       | 0.14  | -0.85 | -0.77 | -0.59              | -0.94               |
| CHCOH-                  |       | -0.36 | -0.33            | -0.57            | 1.49  | -0.16 | -0.57 | -0.06 | 0.16               | -0.58               |
| CH <sub>2</sub> COH-    | -0.60 | -0.15 | -1.39            | -0.91            | 0.21  | -0.35 | -0.95 | -1.20 | -1.14              | -0.99               |
| CH <sub>3</sub> COH-    | -1.48 | -1.13 | -1.65            | -0.46            | 0.14  | -0.69 | -1.38 | -1.46 | -0.34              | -0.60               |
| CCHO-                   |       |       |                  | 0.28             |       | 1.12  | 0.80  |       |                    | 0.32                |
| CHCHO-                  |       |       |                  | 0.55             |       | 0.97  | 0.46  |       |                    | 0.11                |
| CH <sub>2</sub> CHO-    |       |       | 0.08             | -0.06            |       | 0.79  | 0.31  | 0.30  | 0.38               | 0.10                |
| CH <sub>3</sub> CHO-    | 0.05  | 0.14  | -0.98            | -1.12            | -0.01 | -0.25 | -0.67 | -0.70 | -0.64              | -1.12               |
| CCHOH-                  |       |       |                  | -0.10            |       |       | 0.20  |       | 0.16               | -0.06               |
| CHCHOH-                 |       | 1.06  | 0.01             | -0.11            | 1.28  | 0.31  | 0.70  | -0.19 | 0.21               | -0.13               |
| CH <sub>2</sub> CHOH-   |       | 0.41  | -0.42            | -0.45            | 0.67  | 0.23  | -0.11 | -0.30 | -0.07              | -0.56               |
| CH <sub>3</sub> CHOH-   | -0.80 | -0.38 | -1.11            | -1.18            | -0.05 | -0.50 | -0.69 | -0.90 | -0.96              | -1.26               |
| COCO-                   |       |       | -1.09            | -0.70            | 0.83  | -0.86 | -0.69 | -1.22 | -0.34              | -0.96               |
| COHCO-                  | 0.08  | 0.97  | -1.04            | -1.32            | -0.30 | -1.19 | -0.66 | -1.20 | 0.04               | -0.62               |
| CHOCO-                  | -0.43 | -0.70 | -1.43            | -1.19            | 0.19  | -0.33 | -1.63 | -1.79 | -1.10              | -1.62               |
| CHOHCO-                 | -0.64 | -0.95 | -2.00            | -1.63            | -0.71 | -1.24 | -2.16 | -2.03 | -2.07              | -1.71               |
| CH <sub>2</sub> OCO-    | -0.36 | -0.13 | -0.85            | -0.49            | 0.75  | 0.57  | -0.89 | -1.50 | -0.16              | -0.44               |
| CH <sub>2</sub> OHCO-   | -0.78 | -0.89 | -1.38            | -0.68            | 0.06  | -0.15 | -1.47 | -1.19 | -0.50              | -0.94               |
| COCO-                   |       | 0.21  | -1.26            | -0.58            | -0.48 | -1.36 | -0.40 | -1.64 | -0.16              | -0.41               |
| COHCO-                  | 0.28  | -0.02 | -0.39            | 0.01             | 0.06  | -0.73 | -0.67 | -0.47 | -0.18              | -0.17               |
| CHOCO-                  | -0.69 | -0.42 | -0.98            | -0.67            | 1.04  | -0.65 | -0.94 | -1.03 | -0.80              | -1.05               |
| CHOHCO-                 | -0.62 | 0.07  | -1.25            | -0.76            | -0.22 | -0.47 | -1.05 | -1.13 | -1.28              | -1.04               |
| CH <sub>2</sub> OCO-    | -1.10 | -0.36 | -1.84            | -0.30            | 0.60  | -0.83 | -1.47 | -1.94 |                    |                     |
| CH <sub>2</sub> OHCO-   | -1.51 | -1.17 | -1.76            | -0.63            | 0.29  | -0.89 | -1.79 | -1.76 |                    | -0.75               |
| COCHO-                  |       |       |                  | -0.95            | 0.35  |       |       | -0.77 | -0.61              | -1.26               |
| COHCHO-                 | 1.06  | 0.73  | 0.05             | -0.08            |       | 0.59  | 0.31  | -0.16 |                    | -0.67               |
| CHOCHO-                 | 1.10  | 0.59  | -0.07            | -0.13            |       | 0.68  | 0.08  | -0.14 | -0.06              | -0.57               |
| CHOHCHO-                |       |       | -0.18            | -0.26            | 0.60  | 0.11  | -0.24 | -0.02 | -0.39              |                     |
| CH <sub>2</sub> OCHO-   |       |       | -0.47            | -0.57            | 0.40  |       | -0.53 | -0.75 | -0.17              | -0.74               |
| CH <sub>2</sub> OHCHO-  | 0.06  | -0.32 | -0.83            | -1.14            | -0.34 | -0.86 | -1.13 |       | -0.83              | -1.63               |
| COCHOH-                 |       | -0.40 | -1.40            | -1.46            | -0.41 | -0.81 |       | -1.49 | -1.41              | -1.72               |
| COHCHOH-                |       | 0.10  | -0.37            | -0.44            | 0.65  | -0.02 | -0.14 | -0.44 | -0.15              | -0.69               |
| CHOCHOH-                | -0.17 | 0.77  | -0.44            | -0.36            |       | 0.14  | -0.08 | -0.59 | -0.59              | -0.63               |
| CHOHCHOH-               |       | -0.03 | -0.53            | -0.48            | 0.35  | -0.07 | -0.50 | -0.57 | -0.52              | -0.71               |
| CH <sub>2</sub> OCHOH-  | -0.66 | -0.18 | -0.86            | -1.08            | -0.13 | -0.33 | -1.05 | -1.07 | -1.04              | -0.97               |
| CH <sub>2</sub> OHCHOH- | -0.51 | -0.14 | -0.97            | -1.01            | -0.06 | -0.49 | -0.71 | -0.88 | -0.59              | -1.20               |

**Table S17.** Activation energies ( $E_a$ ) in eV, for the different C<sub>1</sub>–C<sub>2</sub> couplings. Zero values indicate barrierless reactions. For reaction marked with an asterisk (\*), the minimum-energy path was not fully converged, thus the table with the maximum energy descent was selected. The connecting point between the two fragments is shown by (–) marks the direction. Void boxes denote not located transition states.

|                                   | –C    | –CH   | –CH <sub>2</sub> | –CH <sub>3</sub> | –CO   | –COH  | –CHO  | –CHOH | –CH <sub>2</sub> O | –CH <sub>2</sub> OH |
|-----------------------------------|-------|-------|------------------|------------------|-------|-------|-------|-------|--------------------|---------------------|
| CC                                | 1.02  | 1.45  | 1.46             | 1.33             | 0.82  | 0.95  | 0.51  | 0.38  | 0.24               | 1.23                |
| CHC                               | 1.10  | 0.62  | 0.85             | 0.81             | 0.99  |       | 0.43  | 0.91  | 0.81               | 2.00                |
| CH <sub>2</sub> C                 | 1.82  | 1.83  | 1.41             | 1.25             | 1.10  | 1.31  | 0.60  | 0.48  | 0.76               | 1.40                |
| CH <sub>3</sub> C                 |       | 1.31  | 0.38             | 1.00             | 0.96  | 0.88  | *0.75 |       |                    | 0.92                |
| CCH                               | 0.57  | *0.85 | 0.50             | 1.82             | 1.51  | 1.13  | 0.41  | *1.93 | 0.59               | 1.36                |
| CHCH                              | *0.69 | 0.94  | 0.70             | *2.37            | 1.23  | 1.15  | 0.23  | 1.46  | 0.59               | *2.41               |
| CH <sub>2</sub> CH                | 1.00  | 0.83  | 1.42             | *0.96            | 0.76  | 1.14  | 0.08  | *0.45 | 0.72               | *2.00               |
| CH <sub>3</sub> CH                | 1.34  | *0.87 | *0.11            | 0.41             | 0.62  | *1.12 | 0.19  | 0.00  | 0.68               | *1.60               |
| CCH <sub>2</sub>                  | 1.00  |       |                  | 1.33             |       | 1.24  | 1.53  | 0.36  | *0.60              | *0.86               |
| CHCH <sub>2</sub>                 |       | 1.81  | 1.08             | 1.64             | 0.98  | 1.56  | 0.24  | 0.80  | 0.53               | *0.35               |
| CH <sub>2</sub> CH <sub>2</sub>   |       | 1.45  | 1.19             | 1.73             | 1.11  | 1.53  | 1.61  | 1.05  | 1.22               | 2.02                |
| CH <sub>3</sub> CH <sub>2</sub>   | 0.98  | 0.75  | 0.68             | 2.70             | 2.15  | 1.21  |       | 0.26  | 1.06               | *1.11               |
| COC                               | 1.38  | 1.34  | 1.54             | 2.09             | 2.07  | 1.73  | 1.81  | 0.74  | 0.98               | 1.58                |
| COHC                              | 1.22  | 1.08  | 0.66             | 0.94             | 1.42  |       | 0.61  | 0.82  | *0.38              | 0.98                |
| CHOC                              | 0.98  | 0.63  | 0.52             | *0.95            | 1.73  | 1.62  | 0.35  | 0.34  | 0.60               | 0.68                |
| CHOHC                             | 1.24  | 1.34  |                  | 1.62             | 1.35  | 1.71  | 0.80  | *1.84 | 0.87               | 1.05                |
| CH <sub>2</sub> OC                |       |       | 0.39             |                  | 1.09  | *1.10 | 0.50  | 0.43  |                    | 0.78                |
| CH <sub>2</sub> OHC               | 0.91  | 1.53  | 0.80             | 1.09             | 1.43  |       | 0.44  | 0.99  | 0.77               | 1.06                |
| COCH                              | 2.47  |       | 1.60             | 1.43             | 1.76  | 1.48  | 1.05  | 2.09  | 0.68               | *1.84               |
| COHCH                             | 1.28  |       | 1.89             | *2.79            | 2.12  | 0.50  |       | *1.35 | *1.09              | 1.24                |
| CHOCH                             | 0.63  | 1.42  | 1.25             | 0.87             | 1.04  |       | *3.12 | 0.70  | 0.71               | 1.39                |
| CHOHCH                            | *1.40 | 1.16  | *0.68            | 1.53             | 1.14  |       | 0.65  | 0.78  | 0.81               | *1.37               |
| CH <sub>2</sub> OCH               |       | 1.36  |                  | 0.00             | 1.09  | *0.73 | 0.00  | 0.34  | 0.40               | 0.63                |
| CH <sub>2</sub> OHCH              | 0.97  | *0.87 | *1.36            | *0.56            | *1.72 | 1.37  | 0.16  | *2.34 | 0.82               | *1.66               |
| COCH <sub>2</sub>                 |       | 1.48  | 0.86             | 2.37             | 0.65  |       | 0.78  | 0.84  | *0.82              | 1.96                |
| COHCH <sub>2</sub>                | 0.99  | 1.87  | 1.17             | 1.90             | 1.18  | 1.30  | 0.71  | 1.13  | *0.62              | *1.01               |
| CHOCH <sub>2</sub>                | 2.37  | 1.52  | 1.24             | 2.24             | 1.59  | 1.57  | *2.36 | 1.41  | *1.04              | *2.47               |
| CHOHCH <sub>2</sub>               | 1.85  | 2.05  | 1.17             | 1.03             | 1.46  |       | 2.36  | 0.92  | 0.64               | 1.87                |
| CH <sub>2</sub> OCH <sub>2</sub>  | *0.67 | 0.77  | 1.24             | *2.18            | *2.35 | *1.43 | *1.71 | 1.37  | 1.63               | *1.57               |
| CH <sub>2</sub> OHCH <sub>2</sub> | *0.56 | *1.15 | 1.39             | *1.65            | 2.36  | *1.37 |       | 2.32  | 1.06               | *0.94               |

Continues on next page.

**Table S17.** Continues from the previous page.

|                         | -C    | -CH   | -CH <sub>2</sub> | -CH <sub>3</sub> | -CO   | -COH  | -CHO  | -CHOH | -CH <sub>2</sub> O | -CH <sub>2</sub> OH |
|-------------------------|-------|-------|------------------|------------------|-------|-------|-------|-------|--------------------|---------------------|
| CCO-                    |       |       | 1.26             | *1.60            |       | 1.87  | 1.56  | *0.94 | 1.08               | 1.04                |
| CHCO-                   |       | 1.55  | 1.08             | 2.11             |       |       | 1.06  | 1.23  | 1.00               | 1.37                |
| CH <sub>2</sub> CO-     | 0.83  | 0.71  |                  | 0.84             | 0.62  | 0.98  | *0.00 | *0.00 | 0.00               | *0.42               |
| CH <sub>3</sub> CO-     | *0.57 | 0.72  | 0.28             | *1.74            | *0.75 | 1.01  | 0.32  | *0.73 | *0.63              | *1.55               |
| CCOH-                   |       |       | 1.53             | *0.45            |       |       | 0.44  | *0.25 | *0.60              |                     |
| CHCOH-                  |       | *0.96 |                  | 3.09             | 2.62  | 0.68  | *3.21 | 1.83  | *1.41              | *2.27               |
| CH <sub>2</sub> COH-    | 2.36  | *1.42 | 1.12             | 1.88             | *1.14 | 1.45  | 0.52  | 0.41  |                    | *0.41               |
| CH <sub>3</sub> COH-    | *0.67 | 0.26  | 1.86             | 1.77             | 0.69  | 1.14  | 0.21  | 1.91  | *0.35              | *0.69               |
| CCHO-                   |       |       |                  |                  |       | 1.67  | *0.71 |       |                    | *1.14               |
| CHCHO-                  |       |       |                  | 2.15             |       |       | 0.91  |       |                    | *0.93               |
| CH <sub>2</sub> CHO-    |       |       | 1.24             | 1.48             | 2.05  | 1.96  | 0.97  | 1.24  | 1.16               | 1.47                |
| CH <sub>3</sub> CHO-    | 1.86  | 0.92  | 0.48             | 0.83             | 0.30  | 1.14  | *1.25 | 0.58  | 0.50               | *0.22               |
| CCHOH-                  |       |       |                  | 2.02             |       |       | 1.06  |       | 0.59               | *0.80               |
| CHCHOH-                 |       | 1.92  | 1.34             | 1.70             | 1.25  |       | 1.51  |       | 0.70               | 1.40                |
| CH <sub>2</sub> CHOH-   |       | 1.68  | 1.22             | 1.50             | 0.88  | 1.58  | 1.03  | 0.97  | 0.92               | 1.64                |
| CH <sub>3</sub> CHOH-   | 0.71  | 1.10  | 1.15             | *1.15            | 0.99  | 1.45  | 1.18  | 1.28  | *0.74              | *1.29               |
| COCO-                   |       |       |                  | *1.41            | 0.92  | 0.96  | 0.73  | 0.41  | 0.79               | *1.49               |
| COHCO-                  | 1.97  | 1.21  | 0.40             | 1.81             | 0.79  |       | 1.15  | 0.52  |                    | 0.25                |
| CHOCO-                  | 2.24  | 1.02  | *0.76            | 1.04             | *0.95 | 1.23  | 0.29  | *3.09 | *0.70              | *0.16               |
| CHOHCO-                 | *0.82 | 0.14  | *0.00            | *0.14            | 0.03  | 0.53  | *1.01 | 0.00  | 0.00               | *0.70               |
| CH <sub>2</sub> OCO-    | 0.55  |       | 1.04             | *1.91            | 1.41  | 1.51  | *0.47 | 0.54  | 1.23               | *1.36               |
| CH <sub>2</sub> OHCO-   | 1.69  | 0.84  | *0.50            | *1.65            | *0.70 |       | *0.13 | *0.39 | *1.44              | *1.57               |
| COCOH-                  |       | 1.56  | *0.05            | 0.55             | 0.96  |       | 1.29  |       | 0.76               | 1.65                |
| COHCOH-                 |       | 1.73  | 0.99             | 1.30             | *1.07 |       | *1.79 | 0.51  | *1.77              | *2.66               |
| CHOCOH-                 | 1.47  | *0.93 | 1.32             | 1.82             | 3.31  | *1.60 | 1.47  | *1.91 | 1.40               | *0.89               |
| CHOHCOH-                | *1.06 | 1.28  | 0.64             | 2.97             | 0.91  | 1.31  | *0.54 | 0.81  | *0.24              | *1.76               |
| CH <sub>2</sub> OCOH-   | *1.85 | *1.45 |                  | *0.61            | 1.84  |       | 0.54  |       |                    |                     |
| CH <sub>2</sub> OHCOH-  | 0.72  | *0.15 |                  | *2.85            | 1.37  | *0.93 | *0.01 | *0.00 |                    | *1.86               |
| COCHO-                  |       |       |                  | 0.91             | 0.78  |       |       | 0.72  | 0.42               | *0.01               |
| COHCHO-                 | 1.07  |       | 1.26             | 1.56             |       | 1.42  |       |       |                    | *0.48               |
| CHOCHO-                 | *0.96 | 1.46  | 0.78             | *1.64            |       | 1.65  | *0.97 | 0.56  | *0.36              | 1.32                |
| CHOHCHO-                |       |       | 1.10             | 1.31             | 1.16  |       | 0.78  | 0.87  | 0.76               |                     |
| CH <sub>2</sub> OCHO-   |       |       | 0.72             | 1.40             | 0.80  |       | *1.86 | 0.47  | 0.93               | *1.03               |
| CH <sub>2</sub> OHCHO-  | *0.64 | *0.74 | 0.37             | *0.77            | *0.41 | *0.97 | 0.47  |       | *0.13              | *0.65               |
| COCHOH-                 |       | 0.47  | 0.24             | 0.91             | 0.00  | *0.84 |       | 0.00  | 0.00               | *0.01               |
| COHCHOH-                |       |       | 1.03             | 1.72             | *0.33 | 1.29  |       | 0.56  | *0.45              | 1.18                |
| CHOCHOH-                | 1.62  | 1.33  | 0.68             | 1.47             |       | 1.25  | 0.61  | *0.40 | *0.51              | *2.03               |
| CHOHCHOH-               |       |       | 1.12             | 1.58             | 1.14  | 1.65  | *0.79 | 0.93  | 0.85               | *2.07               |
| CH <sub>2</sub> OCHOH-  | 0.71  | 1.27  | 0.96             | *1.82            | 0.97  |       | *0.22 |       |                    | *0.99               |
| CH <sub>2</sub> OHCHOH- | *2.41 | 1.56  | 1.19             | *1.85            | *1.21 | 1.89  | *2.33 | *1.60 | *1.80              | *1.60               |

**Table S18.** Bader charge differences upon reaction,  $\Delta\Delta Q_B$  (in  $|e^-|$ , **Eq. S5** in Main Text), for  $C_1$ – $C_2$  couplings. Negative values indicate that the  $C_3$  products have more electronic density than the combined  $C_1$ – $C_2$  reactants and thus the net reaction is promoted under reductive potentials. The (–) marks the direction in which the C–C bond is formed. Void boxes indicate unstable  $C_3$  species. Thicker lines cluster  $C_1$  and  $C_2$ .

|                                   | –C   | –CH  | –CH <sub>2</sub> | –CH <sub>3</sub> | –CO   | –COH  | –CHO  | –CHOH | –CH <sub>2</sub> O | –CH <sub>2</sub> OH |
|-----------------------------------|------|------|------------------|------------------|-------|-------|-------|-------|--------------------|---------------------|
| CC                                | 0.60 | 0.72 | 0.91             | 0.89             | 0.47  | 0.55  | 0.65  | 0.60  | 0.63               | 0.62                |
| CHC                               | 0.48 | 0.75 | 0.86             | 0.33             | 0.31  | 0.78  | 0.35  | 0.32  | 0.77               | 0.87                |
| CH <sub>2</sub> C                 | 0.87 | 1.05 | 0.67             | 0.60             | 0.30  | 0.78  | 0.64  | 0.87  | 0.46               | 0.52                |
| CH <sub>3</sub> C                 | 1.18 | 0.86 | 0.93             | 0.70             | 0.55  | 0.64  | 0.37  | 0.59  | 1.02               | 0.54                |
| CCH                               | 0.25 | 0.27 | 0.53             | 0.38             | 0.38  | 0.53  | 0.10  | 0.29  | 0.21               | 0.23                |
| CHCH                              | 0.45 | 0.72 | 0.72             | 0.65             | 0.24  | 0.63  | 0.29  | 0.28  | 0.48               | 0.50                |
| CH <sub>2</sub> CH                | 0.60 | 0.61 | 0.71             | 0.71             | 0.50  | 0.53  | 0.30  | 0.35  | 0.48               | 0.61                |
| CH <sub>3</sub> CH                | 0.90 | 0.99 | 1.16             | 0.63             | 0.12  | 0.70  | 0.51  | 0.80  | 0.45               | 0.51                |
| CCH <sub>2</sub>                  | 0.46 |      | 0.73             | 0.31             |       | 0.42  | 0.54  | 0.38  | 0.20               | 0.24                |
| CHCH <sub>2</sub>                 |      | 0.52 | 0.44             | 0.32             | 0.01  | 0.46  | 0.46  | 0.16  | 0.02               | 0.21                |
| CH <sub>2</sub> CH <sub>2</sub>   | 0.44 | 0.27 | 0.16             | 0.10             | –0.31 | 0.21  | 0.25  | –0.18 | –0.05              | –0.03               |
| CH <sub>3</sub> CH <sub>2</sub>   | 0.54 | 0.68 | 0.62             | 0.49             | 0.43  | 0.64  | 0.75  | 0.32  | 0.39               | 0.45                |
| COC                               | 0.87 | 0.95 | 0.75             | 0.66             | 1.05  | 0.84  | 0.77  | 0.95  | 0.50               | 0.52                |
| COHC                              | 0.55 | 1.03 | 0.84             | 0.35             | 0.44  | 0.45  | 0.36  | 0.39  | 0.24               | 0.24                |
| CHOC                              | 1.01 | 0.94 | 1.05             | 0.43             | 0.72  | 0.71  | 0.57  | 0.70  | 0.36               | 0.31                |
| CHOHC                             | 0.92 | 0.88 | 1.23             | 0.62             | 0.86  | 0.71  | 0.66  | 0.83  | 0.49               | 0.50                |
| CH <sub>2</sub> OC                | 0.97 | 1.35 | 0.85             | 1.07             | 0.44  | 0.58  | 0.34  | 0.51  |                    | 0.45                |
| CH <sub>2</sub> OHC               | 1.06 | 1.56 | 1.02             | 0.70             | 0.56  | 0.68  | 0.40  | 0.62  | 0.55               | 0.44                |
| COCH                              | 0.79 | 0.47 | 0.84             | 0.00             | 0.25  | 0.76  | 0.91  | 0.19  | 0.61               | 0.64                |
| COHCH                             | 0.97 | 0.90 | 0.90             | 0.62             | 0.80  | 0.85  |       | 0.90  | 0.41               | 0.54                |
| CHOCH                             | 0.74 | 0.76 | 0.88             | 0.63             | 1.15  |       | 0.70  | 0.99  | 0.52               | 0.53                |
| CHOHCH                            | 0.73 | 0.54 | 0.72             | 0.72             | 0.22  | 0.90  | 0.78  | 0.29  | 0.52               | 0.56                |
| CH <sub>2</sub> OCH               | 0.65 | 0.75 | 0.86             | 0.38             | 0.65  | 0.41  | 0.31  | 0.52  | 0.22               | 0.24                |
| CH <sub>2</sub> OHCH              | 0.78 | 0.87 | 1.09             | 0.54             | 0.79  | 0.65  | 0.44  | 0.67  | 0.35               | 0.40                |
| COCH <sub>2</sub>                 |      | 0.02 | –0.14            | 0.07             | –0.55 | –0.05 | –0.05 | –0.48 | –0.03              | –0.11               |
| COHCH <sub>2</sub>                | 0.56 | 0.73 | 0.64             | 0.55             | 0.22  | 0.49  | 0.53  | 0.16  | 0.58               | 0.37                |
| CHOCH <sub>2</sub>                | 0.84 | 0.88 | 0.85             | 0.82             | 0.37  | 0.69  | 0.98  | 0.51  | 0.68               | 0.75                |
| CHOHCH <sub>2</sub>               | 0.39 | 0.30 | 0.12             | 0.10             | –0.35 | 0.03  | 0.23  | –0.31 | 0.49               | 0.32                |
| CH <sub>2</sub> OCH <sub>2</sub>  | 0.59 | 0.52 | 0.63             | 0.54             | 0.48  | 0.82  | 0.76  | 0.86  | 0.39               | 0.46                |
| CH <sub>2</sub> OHCH <sub>2</sub> | 0.58 | 0.68 | 0.61             | 0.56             | 0.35  | 0.57  | 0.79  | 0.65  | 0.42               | 0.42                |

Continues on next page.

**Table S18.** Continues from the previous page.

|                        | -C    | -CH   | -CH <sub>2</sub> | -CH <sub>3</sub> | -CO   | -COH  | -CHO  | -CHOH | -CH <sub>2</sub> O | -CH <sub>2</sub> OH |
|------------------------|-------|-------|------------------|------------------|-------|-------|-------|-------|--------------------|---------------------|
| CCO                    |       |       | 0.16             | 0.13             |       | 0.33  | 0.24  | 0.23  | 0.05               | 0.07                |
| CHCO                   |       | 0.16  | 0.05             | -0.09            |       | -0.02 | -0.07 | -0.06 | -0.31              | -0.27               |
| CH <sub>2</sub> CO     | -0.41 | -0.28 | -0.29            | -0.32            | -0.65 | -0.29 | -0.52 | -0.67 | -0.52              | -0.40               |
| CH <sub>3</sub> CO     | 0.45  | 0.46  | 0.56             | 0.74             | 0.12  | 0.24  | 0.02  | 0.16  | 0.54               | 0.63                |
| CCOH                   |       |       | 0.52             | 0.43             |       | 0.53  | 0.34  | 0.24  | 0.25               | 0.20                |
| CHCOH                  |       | 0.78  | 0.82             | 0.70             | 0.67  | 0.47  | 0.71  | 0.54  | 0.47               | 0.54                |
| CH <sub>2</sub> COH    | 0.61  | 0.71  | 0.79             | 0.76             | 0.06  | 0.48  | 0.30  | 0.30  | 0.58               | 0.63                |
| CH <sub>3</sub> COH    | 0.63  | 0.70  | 0.87             | 0.86             | -0.19 | 0.36  | 0.22  | 0.36  | 0.22               | 0.73                |
| CCHO                   |       |       |                  | 0.19             |       | 0.35  | 0.29  |       |                    | 0.01                |
| CHCHO                  |       |       |                  | 0.32             |       | 0.45  | 0.43  |       |                    | 0.17                |
| CH <sub>2</sub> CHO    |       |       | 0.16             | 0.08             |       | 0.31  | 0.22  | -0.15 | -0.12              | -0.06               |
| CH <sub>3</sub> CHO    | -0.09 | 0.00  | -0.08            | -0.20            | -0.46 | 0.01  | 0.02  | -0.49 | -0.34              | -0.34               |
| CCHOH                  |       |       |                  | 0.22             |       |       | 0.35  |       | 0.08               | 0.06                |
| CHCHOH                 |       | 0.39  | 0.28             | 0.24             | -0.12 | 0.23  | 0.32  | 0.15  | 0.09               | 0.14                |
| CH <sub>2</sub> CHOH   |       | 0.05  | 0.05             | -0.03            | -0.38 | 0.06  | 0.12  | -0.33 | -0.20              | -0.14               |
| CH <sub>3</sub> CHOH   | 0.46  | 0.61  | 0.57             | 0.52             | 0.09  | 0.56  | 0.47  | 0.15  | 0.33               | 0.37                |
| COCO                   |       |       | 0.73             | 0.61             | 0.14  | 0.31  | 0.81  | 0.27  | 0.52               | 0.20                |
| COHCO                  | 0.41  | 0.30  | 0.36             | 0.01             | -0.41 | 0.16  | -0.25 | -0.02 | -0.11              | -0.26               |
| CHOCO                  | 0.63  | 0.56  | 0.44             | 0.10             | 0.39  | 0.06  | 0.07  | 0.37  | -0.09              | -0.05               |
| CHOHCO                 | 0.19  | 0.14  | -0.14            | -0.20            | -0.58 | -0.14 | -0.06 | -0.43 | -0.35              | -0.35               |
| CH <sub>2</sub> OCO    | 0.38  | 0.27  | 0.39             | 0.57             | 0.05  | 0.14  | -0.14 | 0.03  | 0.37               | 0.43                |
| CH <sub>2</sub> OHCO   | 0.40  | 0.30  | 0.51             | 0.65             | -0.27 | -0.01 | -0.11 | 0.02  | 0.43               | 0.50                |
| COCOH                  |       | 0.95  | 0.45             | 0.09             | -0.37 | 0.27  | 0.91  | 0.12  | 0.59               | 0.60                |
| COHCOH                 | 0.91  | 0.65  | 0.77             | 0.54             | 0.16  | 0.65  | 0.64  | 0.62  | 0.37               | 0.39                |
| CHOCOH                 | 0.98  | 1.14  | 0.85             | 0.65             | 1.07  | 0.89  | 0.69  | 0.97  | 0.50               | 0.49                |
| CHOHCOH                | 0.73  | 0.83  | 0.70             | 0.65             | 0.13  | 0.73  | 0.83  | 0.35  | 0.54               | 0.55                |
| CH <sub>2</sub> OCOH   | 0.37  | 0.39  | 0.61             | 0.14             | 0.23  | 0.11  | -0.02 | 0.17  |                    |                     |
| CH <sub>2</sub> OHCOH  | 0.65  | 0.79  | 1.00             | 0.98             | 0.57  | 0.46  | 0.31  | 0.51  |                    | 0.86                |
| COCHO                  |       |       |                  | 0.24             | 0.10  |       |       | 0.06  | 0.14               | 0.09                |
| COHCHO                 | 0.63  | 0.69  | 0.70             | 0.57             |       | 0.67  | 0.73  | 0.31  |                    | 0.33                |
| CHOCHO                 | 0.75  | 0.85  | 0.80             | 0.76             |       | 0.91  | 0.95  | 0.39  | 0.56               | 0.63                |
| CHOHCHO                |       |       | 0.31             | 0.14             | -0.02 | 0.38  | 0.28  | -0.05 | 0.06               |                     |
| CH <sub>2</sub> OCHO   |       |       | -0.20            | -0.26            | -0.48 |       | -0.09 | -0.48 | -0.36              | -0.36               |
| CH <sub>2</sub> OHCHO  | -0.16 | -0.05 | -0.12            | -0.24            | -0.51 | -0.12 | 0.00  |       | -0.34              | -0.29               |
| COCHOH                 |       | 0.05  | 0.01             | -0.11            | -0.42 | -0.08 |       | -0.38 | -0.30              | -0.37               |
| COHCHOH                |       | 0.52  | 0.59             | 0.49             | 0.05  | 0.35  | 0.64  | 0.15  | 0.53               | 0.35                |
| CHOCHOH                | 0.74  | 0.83  | 0.87             | 0.61             |       | 0.86  | 0.90  | 0.49  | 0.67               | 0.58                |
| CHOHCHOH               |       | 0.41  | 0.16             | 0.04             | -0.29 | 0.12  | 0.24  | -0.27 | -0.11              | -0.10               |
| CH <sub>2</sub> OCHOH  | 0.44  | 0.57  | 0.51             | 0.45             | 0.02  | 0.72  | 0.63  | 0.11  | 0.25               | 0.37                |
| CH <sub>2</sub> OHCHOH | 0.41  | 0.61  | 0.56             | 0.47             | -0.06 | 0.52  | 0.54  | 0.12  | 0.36               | 0.39                |

**Table S19.** Reaction and activation energies,  $\Delta E$  and  $E_a$ , in eV, for crucial  $C_1$ – $C_2$  condensation reactions at  $U = 0.0$  V vs. RHE found in **Table S17**. DFT values without solvation are indicated with “<sub>DFT</sub>” subscript. Bader charge differences upon reaction,  $\Delta\Delta Q_{B,\Delta E}$ , and from the initial to the transition state,  $\Delta\Delta Q_{B,Ea}$ . Positive values indicate an increase in electronic density, thus the given step is promoted under reductive potentials. The labels to find the respective transition states in the ioChem-BD database are indicated<sup>9,10</sup>. Four substitution reactions were also considered, where CO or CHO replaces O or OH in a concerted step.

| Reaction (top)<br>Label ioChem-BD (bottom)                                                                | $\Delta E_{DFT}$ /<br>eV | $E_{a,DFT}$ /<br>eV | $\Delta E$ /<br>eV | $E_a$ /<br>eV | $\Delta\Delta Q_{B,\Delta E}$ /<br>e <sup>−</sup> | $\Delta\Delta Q_{B,Ea}$ /<br>e <sup>−</sup> |
|-----------------------------------------------------------------------------------------------------------|--------------------------|---------------------|--------------------|---------------|---------------------------------------------------|---------------------------------------------|
| COCO*+CO*→COCOCO*+*                                                                                       | 0.54                     | 0.96                | 0.30               | 0.92          | −0.14                                             | −0.07                                       |
| i202101+i101101-i303101+i000000                                                                           |                          |                     |                    |               |                                                   |                                             |
| COCO*+CHO*→COCOCHO*+*                                                                                     | −0.75                    | 0.73                | −0.69              | 0.73          | −0.81                                             | −0.12                                       |
| i202101+i111101-i313101+i000000                                                                           |                          |                     |                    |               |                                                   |                                             |
| COCHO*+CO*→COCOCHO*+*                                                                                     | −0.10                    | 0.81                | 0.18               | 0.78          | −0.39                                             | −0.02                                       |
| i212101+i101101-i313101+i000000                                                                           |                          |                     |                    |               |                                                   |                                             |
| CH <sub>2</sub> CH*+CO*→CH <sub>2</sub> CHCO*+*                                                           | 0.30                     | 0.78                | 0.25               | 0.76          | −0.50                                             | −0.18                                       |
| i230102+i101101-i331102+i000000                                                                           |                          |                     |                    |               |                                                   |                                             |
| CH <sub>2</sub> CH*+CHO*→CH <sub>2</sub> CHCHO*+*                                                         | −1.47                    | 0.09                | −1.52              | 0.08          | −0.30                                             | −0.90                                       |
| i230102+i111101-i341104+i000000                                                                           |                          |                     |                    |               |                                                   |                                             |
| CH <sub>2</sub> CH*+CH <sub>2</sub> O*→CH <sub>2</sub> CHCH <sub>2</sub> O*+*                             | −1.11                    | 0.71                | −1.14              | 0.72          | −0.48                                             | −0.53                                       |
| i230102+i121101-i351105+i000000                                                                           |                          |                     |                    |               |                                                   |                                             |
| CHCH <sub>2</sub> *+CH <sub>2</sub> O*→CHCH <sub>2</sub> CH <sub>2</sub> O*+*                             | −0.25                    | 0.50                | −0.24              | 0.53          | −0.02                                             | −0.46                                       |
| i230102+i121101-i351106+i000000                                                                           |                          |                     |                    |               |                                                   |                                             |
| CH <sub>2</sub> CHO*+CO*→CH <sub>2</sub> CHCO*+O*                                                         | 1.13                     | 2.08                | 1.06               | 2.05          | 0.42                                              | 0.26                                        |
| i231101+i101101-i331102+i001101                                                                           |                          |                     |                    |               |                                                   |                                             |
| CH <sub>2</sub> CHO*+CO*→CH <sub>2</sub> C(O)HCO*+*                                                       | 1.04                     | 1.88                | 1.24               | 1.78          | −0.37                                             | −0.08                                       |
| i231101+i101101-i332202+i000000                                                                           |                          |                     |                    |               |                                                   |                                             |
| CH <sub>2</sub> CHO*+CHO*→CH <sub>2</sub> CHCHO*+O*                                                       | −0.64                    | 0.95                | −0.71              | 0.97          | 0.62                                              | 0.02                                        |
| i231101+i111101-i341104+i001101                                                                           |                          |                     |                    |               |                                                   |                                             |
| CH <sub>3</sub> CH*+CHO*→CH <sub>3</sub> CHCHO*+*                                                         | −1.98                    | 0.17                | −1.98              | 0.19          | −0.51                                             | −0.29                                       |
| i240101+i111101-i351102+i000000                                                                           |                          |                     |                    |               |                                                   |                                             |
| CH <sub>3</sub> CH*+CH <sub>2</sub> O*→CH <sub>3</sub> CHCH <sub>2</sub> O*+*                             | −1.15                    | 0.68                | −1.16              | 0.68          | −0.45                                             | −0.51                                       |
| i240101+i121101-i361102+i000000                                                                           |                          |                     |                    |               |                                                   |                                             |
| CH <sub>2</sub> CH <sub>2</sub> *+CO*→CH <sub>2</sub> CH <sub>2</sub> CO*+*                               | 0.39                     | 1.06                | 0.38               | 1.11          | 0.31                                              | 0.10                                        |
| i240102+i101101-i341102+i000000                                                                           |                          |                     |                    |               |                                                   |                                             |
| CH <sub>2</sub> CH <sub>2</sub> *+CHO*→CH <sub>2</sub> CH <sub>2</sub> CHO*+*                             | −0.36                    | 1.63                | −0.41              | 1.61          | −0.25                                             | −0.26                                       |
| i240102+i111101-i351103+i000000                                                                           |                          |                     |                    |               |                                                   |                                             |
| CH <sub>2</sub> CH <sub>2</sub> *+CH <sub>2</sub> O*→CH <sub>2</sub> CH <sub>2</sub> CH <sub>2</sub> O*+* | −0.39                    | 1.21                | −0.33              | 1.22          | 0.05                                              | −0.35                                       |
| i240102+i121101-i361103+i000000                                                                           |                          |                     |                    |               |                                                   |                                             |
| CH <sub>2</sub> CHOH*+CO*→CH <sub>2</sub> CHCO*+OH*                                                       | 0.30                     | 0.86                | 0.32               | 0.88          | 0.53                                              | 0.48                                        |
| i241103+i101101-i331102+i011101                                                                           |                          |                     |                    |               |                                                   |                                             |
| CH <sub>2</sub> CHOH*+CHO*→CH <sub>2</sub> CHCHO*+OH*                                                     | −1.47                    | 0.97                | −1.45              | 1.03          | 0.72                                              | 0.33                                        |
| i241103+i111101-i341104+i011101                                                                           |                          |                     |                    |               |                                                   |                                             |
| CH <sub>3</sub> CH <sub>2</sub> *+CH <sub>2</sub> O*→CH <sub>3</sub> CH <sub>2</sub> CH <sub>2</sub> O*+* | −1.33                    | 1.03                | −1.36              | 1.06          | 0.39                                              | 0.05                                        |
| i250101+i121101-i371101+i000000                                                                           |                          |                     |                    |               |                                                   |                                             |

**Table S20.** Reaction and activation energies,  $\Delta E$  and  $E_a$ , in eV, for selected C–O(H) breaking reactions at  $U = 0.0$  V vs. RHE. DFT values without solvation are indicated with “<sub>DFT</sub>” subscript. Bader charge differences upon reaction,  $\Delta\Delta Q_{B,\Delta E}$ , and from the initial to the transition state,  $\Delta Q_{B,Ea}$ . Positive values indicate an increase in electronic density, thus the given step is promoted under reductive potentials. The labels to find the respective transition states in the ioChem-BD database are indicated<sup>9,10</sup>.

| Reaction (top)<br>Label ioChem-BD (bottom)                                                                         | $\Delta E_{\text{DFT}} /$<br>eV | $E_{a,\text{DFT}} /$<br>eV | $\Delta E /$<br>eV | $E_a /$<br>eV | $\Delta\Delta Q_{B,\Delta E} /$<br>e <sup>−</sup> | $\Delta\Delta Q_{B,Ea} /$<br>e <sup>−</sup> |
|--------------------------------------------------------------------------------------------------------------------|---------------------------------|----------------------------|--------------------|---------------|---------------------------------------------------|---------------------------------------------|
| CH <sub>2</sub> CHCO*+*→CH <sub>2</sub> CHC*+O*<br>i331102+i000000-i330102+i001101                                 | −0.07                           | 1.58                       | −0.06              | 1.59          | 1.63                                              | 1.08                                        |
| CH <sub>2</sub> CHCHO*+*→CH <sub>2</sub> CHCH*+O*<br>i341104+i000000-i340104+i001101                               | 0.52                            | 2.07                       | 0.53               | 2.08          | 1.03                                              | 0.45                                        |
| CH <sub>2</sub> CHCOH*+*→CH <sub>2</sub> CHC*+OH*<br>i34110a+i000000-i330102+i011101                               | −0.61                           | 1.33                       | −0.54              | 1.42          | 0.91                                              | 0.49                                        |
| CH <sub>3</sub> CHCHO*+*→CH <sub>3</sub> CHCH*+O*<br>i351102+i000000-i350102+i001101                               | 0.79                            | 2.38                       | 0.76               | 2.34          | 0.86                                              | 0.36                                        |
| CH <sub>2</sub> CHCH <sub>2</sub> O*+*→CH <sub>2</sub> CHCH <sub>2</sub> *+O*<br>i351105+i000000-i350105+i001101   | −0.01                           | 1.25                       | −0.03              | 1.26          | 0.76                                              | 0.34                                        |
| CH <sub>2</sub> CHCHOH*+*→CH <sub>2</sub> CHCH*+OH*<br>i35110a+i000000-i340104+i011101                             | −0.06                           | 1.28                       | 0.00               | 1.31          | 0.90                                              | 0.49                                        |
| CH <sub>3</sub> CHCH <sub>2</sub> O*+*→CH <sub>3</sub> CHCH <sub>2</sub> *+O*<br>i361102+i000000-i360102+i001101   | −0.28                           | 0.95                       | −0.33              | 0.95          | 0.28                                              | 0.07                                        |
| CH <sub>3</sub> CHCHOH*+*→CH <sub>3</sub> CHCH*+OH*<br>i361105+i000000-i350102+i011101                             | −0.02                           | 1.58                       | 0.07               | 1.64          | 0.97                                              | 0.45                                        |
| CH <sub>2</sub> CHCH <sub>2</sub> OH*+*→CH <sub>2</sub> CHCH <sub>2</sub> *+OH*<br>i361108+i000000-i350105+i011101 | −0.71                           | 0.08                       | −0.63              | 0.17          | 0.87                                              | 0.70                                        |
| CH <sub>3</sub> CHCH <sub>2</sub> OH*+*→CH <sub>3</sub> CHCH <sub>2</sub> *+OH*<br>i371103+i000000-i360102+i011101 | −0.59                           | 0.86                       | −0.57              | 0.94          | 0.33                                              | 0.37                                        |



**Table S21.** Hydrogenation reactions shown on **Figure S7** from LSR benchmarked against explicit DFT-NEB; Reaction and activation energies,  $\Delta E$  and  $E_a$ , in eV, for selected C–H and O–H bond formation reactions at  $U = 0.0$  V vs. RHE. DFT values without solvation are indicated with the “<sub>DFT</sub>” subscript. Bader charge differences upon reaction,  $\Delta\Delta Q_{B,\Delta E}$ , and from the initial to the transition state,  $\Delta Q_{B,Ea}$ . Positive values indicate an increase in electronic density, thus the given step is promoted under reductive potentials. Activation energies calculated using LSR with solvent,  $E_{a,LSR}$ . The difference between LSR and DFT values is shown as  $err(E_a)$ . The labels to find the respective transition states in the ioChem-BD database are indicated<sup>9,10</sup>.

| Reaction (top)<br>Label ioChem-BD (bottom)                                                                                                     | $\Delta E_{DFT}$<br>eV | $E_{a,DFT}$<br>eV | $\Delta E$<br>eV | $E_a$<br>eV | $\Delta\Delta Q_{B,\Delta E}$<br>e <sup>−</sup> | $\Delta\Delta Q_{B,Ea}$<br>e <sup>−</sup> | $E_{a,LSR}$<br>eV | $err(E_a)$<br>eV |
|------------------------------------------------------------------------------------------------------------------------------------------------|------------------------|-------------------|------------------|-------------|-------------------------------------------------|-------------------------------------------|-------------------|------------------|
| COCHCH <sub>2</sub> *+H*→CHOCHCH <sub>2</sub> *+*<br>i331102-i010101+i341104+i000000                                                           | -1.19                  | 0.11              | -1.19            | 0.17        | 0.15                                            | 0.22                                      | 0.37              | 0.20             |
| CHOCHCH <sub>2</sub> *+H*→CHOCHCH <sub>3</sub> *+*<br>i341104-i010101+i351102+i000000                                                          | -0.60                  | 0.61              | -0.55            | 0.67        | -0.36                                           | -0.10                                     | 0.60              | -0.07            |
| CHOCHCH <sub>3</sub> *+H*→CHOCH <sub>2</sub> CH <sub>3</sub> *+*<br>i351102-i010101+i361101+i000000                                            | 0.20                   | 0.95              | 0.13             | 0.97        | -0.81                                           | -0.33                                     | 0.86              | -0.11            |
| CHOCH <sub>2</sub> CH <sub>3</sub> *+H*→CH <sub>2</sub> OCH <sub>2</sub> CH <sub>3</sub> *+*<br>i361101-i010101+i371101+i000000                | -0.77                  | 0.46              | -0.67            | 0.53        | 0.24                                            | 0.10                                      | 0.56              | -0.03            |
| CHOCHCH <sub>2</sub> *+H*→CHOHCHCH <sub>2</sub> *+*<br>i341104-i010101+i35110a+i000000                                                         | 0.11                   | 0.49              | 0.07             | 0.50        | -0.68                                           | -0.11                                     | 0.93              | 0.01             |
| CHOCHCH <sub>3</sub> *+H*→CHOHCHCH <sub>3</sub> *+*<br>i351102-i010101+i361105+i000000                                                         | 0.32                   | 1.10              | 0.22             | 1.06        | -0.92                                           | -0.43                                     | 1.02              | -0.04            |
| CHOCH <sub>2</sub> CH <sub>3</sub> *+H*→CHOHCH <sub>2</sub> CH <sub>3</sub> *+*<br>i361101-i010101+i371102+i000000                             | 0.20                   | 1.07              | 0.22             | 1.11        | -0.19                                           | -0.63                                     | 1.02              | -0.08            |
| CH <sub>2</sub> OCH <sub>2</sub> CH <sub>3</sub> *+H*→CH <sub>2</sub> OHCH <sub>2</sub> CH <sub>3</sub> *+*<br>i371101-i010101+i381101+i000000 | -0.06                  | 0.89              | -0.16            | 0.93        | -0.85                                           | -0.47                                     | 0.79              | -0.14            |

**Table S22.** Reaction energies,  $\Delta E$ , for decomposition of formaldehyde. DFT values without solvation are indicated with the “<sub>DFT</sub>” subscript. Bader charge differences upon reaction,  $\Delta\Delta Q_{B,\Delta E}$ , are shown in e<sup>−</sup>. Positive values indicate an increment in electronic density, thus promoting the given step under reductive potentials. The labels to find the respective transition states in the ioChem-BD database are indicated. Formaldehyde, thus, can hardly decompose into the more reactive moieties CH<sub>2</sub> or CHO, and their production of propylene (**Table 1**) can only be rationalised by aldol condensation<sup>34</sup>.

| Reaction (top)<br>Label ioChem-BD (bottom) | $\Delta E_{DFT}$ / eV | $\Delta E$ / eV | $\Delta\Delta Q_{B,\Delta E}$ / e <sup>−</sup> |
|--------------------------------------------|-----------------------|-----------------|------------------------------------------------|
| CH <sub>2</sub> O*+*→CH <sub>2</sub> *+O*  | 0.36                  | 0.33            | 0.99                                           |
| CH <sub>2</sub> O*+*→CHO*+H*               | 0.47                  | 0.46            | 0.12                                           |

**Table S23.** Faradaic efficiencies (*FE*) and standard deviations (*Stdev.*) of products detected from the electrolysis of 50 mM propionaldehyde (C<sub>3</sub> reagent) on OD-Cu in 0.1 M potassium phosphate buffer (pH 7) at –0.4 V and –1.0 V vs. RHE for 60 min. The values shown are an average taken from three experiments.

| Products   | Propionaldehyde at –0.4 V |                    | Propionaldehyde at –1.0 V |                   |
|------------|---------------------------|--------------------|---------------------------|-------------------|
|            | <i>FE</i> / %             | <i>Stdev.</i> / %. | <i>FE</i> / %             | <i>Stdev.</i> / % |
| Hydrogen   | 52.49                     | 0.28               | 66.14                     | 0.58              |
| Propylene  | 0.08                      | 0.02               | 0.09                      | 0.0001            |
| Propane    | 0.03                      | 0.01               | 0.50                      | 0.04              |
| 1-Propanol | 39.92                     | 0.03               | 10.89                     | 3.06              |

**Table S24.** Faradaic efficiencies (*FE*) and standard deviations (*Stdev.*) of products detected from the electrolysis of 50 mM allyl alcohol (C<sub>3</sub> reagent) on OD-Cu in 0.1 M potassium phosphate buffer (pH 7) at –0.4 V and –1.0 V vs. RHE for 60 min. The values shown are an average taken from three experiments.

| Products   | Allyl alcohol at –0.4 V |                    | Allyl alcohol at –1.0 V |                   |
|------------|-------------------------|--------------------|-------------------------|-------------------|
|            | <i>FE</i> / %           | <i>Stdev.</i> / %. | <i>FE</i> / %           | <i>Stdev.</i> / % |
| Hydrogen   | 75.73                   | 6.60               | 78.78                   | 3.28              |
| Propylene  | 3.59                    | 0.53               | 9.55                    | 2.97              |
| Propane    | 0.15                    | 0.07               | 0.22                    | 0.04              |
| 1-Propanol | 13.71                   | 2.43               | 2.00                    | 0.61              |

## References

- 1 G. Kresse and J. Hafner, *Phys. Rev. B*, 1993, **47**, 558–561.
- 2 J. P. Perdew, K. Burke and M. Ernzerhof, *Phys. Rev. Lett.*, 1996, **77**, 3865–3868.
- 3 S. Grimme, *J. Comput. Chem.*, 2006, **27**, 1787–1799.
- 4 N. Almora-Barrios, G. Carchini, P. Błoński and N. López, *J. Chem. Theory Comput.*, 2014, **10**, 5002–5009.
- 5 G. Kresse and D. Joubert, *Phys. Rev. B*, 1999, **59**, 1758–1775.
- 6 W. Luo, X. Nie, M. J. Janik and A. Asthagiri, *ACS Catal.*, 2016, **6**, 219–229.
- 7 Y. G. Kim, J. H. Baricuatro, A. Javier, J. M. Gregoire and M. P. Soriaga, *Langmuir*, 2014, **30**, 15053–15056.
- 8 G. Henkelman and H. Jónsson, *J. Chem. Phys.*, 2000, **113**, 9978–9985.
- 9 M. Álvarez-Moreno, C. De Graaf, N. López, F. Maseras, J. M. Poblet and C. Bo, *J. Chem. Inf. Model.*, 2015, **55**, 95–103.
- 10 R. García-Muelas, S. Pablo-García and N. López, *Dataset associated to: Mechanistic Routes toward C<sub>3</sub> products in Copper-Catalyzed CO<sub>2</sub> Electroreduction*; DOI 10.19061/iochem-bd-1-175, 2020.
- 11 M. Garcia-Ratés and N. López, *J. Chem. Theory Comput.*, 2016, **12**, 1331–1341.
- 12 M. Garcia-Ratés, R. García-Muelas and N. López, *J. Phys. Chem. C*, 2017, **121**, 13803–13809.
- 13 J. K. Nørskov, J. Rossmeisl, A. Logadottir, L. Lindqvist, J. R. Kitchin, T. Bligaard and H. Jónsson, *J. Phys. Chem. B*, 2004, **108**, 17886–17892.
- 14 A. A. Peterson, F. Abild-Pedersen, F. Studt, J. Rossmeisl and J. K. Nørskov, *Energy Environ. Sci.*, 2010, **3**, 1311–1315.
- 15 Q. Li, R. García-Muelas and N. López, *Nat. Commun.*, 2018, **9**, 526.
- 16 T. Cai, H. Sun, J. Qiao, L. Zhu, F. Zhang, J. Zhang, Z. Tang, X. Wei, J. Yang, Q. Yuan, W. Wang, X. Yang, H. Chu, Q. Wang, C. You, H. Ma, Y. Sun, Y. Li, C. Li, H. Jiang, Q. Wang and Y. Ma, *Science* 2021, **373**, 1523–1527.
- 17 R. B. Sandberg, J. H. Montoya, K. Chan and J. K. Nørskov, *Surf. Sci.*, 2016, **654**, 56–62.
- 18 M. Yu and D. R. Trinkle, *J. Chem. Phys.*, 2011, **134**, 64111.
- 19 R. García-Muelas, F. Dattila, T. Shinagawa, A. J. Martín, J. Pérez-Ramírez and N. López, *J. Phys. Chem. Lett.*, 2018, **9**, 7153–7159.
- 20 N. Yang, A. J. Medford, X. Liu, F. Studt, T. Bligaard, S. F. Bent and J. K. Nørskov, *J. Am. Chem. Soc.*, 2016, **138**, 3705–3714.
- 21 A. J. Medford, J. Wellendorff, A. Vojvodic, F. Studt, F. Abild-Pedersen, K. W. Jacobsen, T. Bligaard and J. K. Nørskov, *Science (80-. )*, 2014, **345**, 197–200.
- 22 E. Walker, S. C. Ammal, G. A. Terejanu and A. Heyden, *J. Phys. Chem. C*, 2016, **120**, 10328–10339.
- 23 J. E. Sutton and D. G. Vlachos, *J. Catal.*, 2016, **338**, 273–283.
- 24 Douglas B. West, *Introduction to Graph Theory*, Pentice Hall, 2nd edn., 2001.
- 25 R. García-Muelas, Q. Li and N. López, *ACS Catal.*, 2015, **5**, 1027–1036.
- 26 M. García-Mota, B. Bridier, J. Pérez-Ramírez and N. López, *J. Catal.*, 2010, **273**, 92–102.
- 27 H. Jónsson, G. Mills and K. W. Jacobsen, in *Classical and Quantum Dynamics in Condensed Phase Simulations*, WORLD SCIENTIFIC, 1998, pp. 385–404.
- 28 G. Henkelman, B. P. Uberuaga and H. Jónsson, *J. Chem. Phys.*, 2000, **113**, 9901–9904.
- 29 S. Pablo-García, M. Álvarez-Moreno and N. López, *Int. J. Quantum Chem.*, 2021, **121**, e26382.
- 30 J. Neugebauer and M. Scheffler, *Phys. Rev. B*, 1992, **46**, 16067–16080.
- 31 N. D. Lang and W. Kohn, *Phys. Rev. B*, 1973, **7**, 3541–3550.
- 32 D. Ren, J. Fong and B. S. Yeo, *Nat. Commun.* 2018 91, 2018, **9**, 925.
- 33 S. Nitopi, E. Bertheussen, S. B. Scott, X. Liu, A. K. Engstfeld, S. Horch, B. Seger, I. E. L. Stephens, K. Chan, C. Hahn, J. K. Nørskov, T. F. Jaramillo and I. Chorkendorff, *Chem. Rev.*, 2019, **119**, 7610–7672.

- 34 L. R. L. Ting, R. García-Muelas, A. J. Martín, F. L. P. Veenstra, S. T.-J. Chen, Y. Peng, E. Y. X. Per, S. Pablo-García, N. López, J. Pérez-Ramírez and B. S. Yeo, *Angew. Chemie Int. Ed.*, 2020, **59**, 21072–21079.
- 35 R. García-Muelas and N. López, *J. Phys. Chem. C*, 2014, **118**, 17531–17537.
- 36 Y. Hori, I. Takahashi, O. Koga and N. Hoshi, *J. Phys. Chem. B*, 2002, **106**, 15–17.
- 37 F. Dattila, R. García-Muelas and N. López, *ACS Energy Lett.*, 2020, **5**, 3176–3184.
- 38 F. Dattila, R. García-Muelas and N. López, *Dataset associated to: Active and Selective Ensembles in Oxide-Derived Copper Catalysts for CO<sub>2</sub> Reduction*; DOI [10.19061/iochem-bd-1-165](https://doi.org/10.19061/iochem-bd-1-165), 2020.
- 39 P. J. Mallard and W. G. Linstrom, 'Thermodynamics source database'. NIST Chemistry WebBook, NIST Standard Reference Database Number 69. National Institute of Standards and Technology, 2018.
